# Supplementary material for: 3 versus 6 months of adjuvant oxaliplatin-fluoropyrimidine combination therapy for colorectal cancer (SCOT): an international, randomised, phase 3, non-inferiority trial
Source: PubMed Central journal article supplement (PMC5883334; doi:10.1016/s1470-2045(18)30093-7), 2018-04
Supplement: mmc1.pdf [file mmc1.pdf]

# THE LANCET Oncology

## Supplementary appendix

This appendix formed part of the original submission and has been peer reviewed. We post it as supplied by the authors.

Supplement to: Iveson TJ, Kerr RS, Saunders MP, et al. 3 versus 6 months of adjuvant oxaliplatin-fluoropyrimidine combination therapy for colorectal cancer (SCOT): an international, randomised, phase 3, non-inferiority trial. *Lancet Oncol* 2018; **19**: 562–78.

**Figure 1: Plot of 3 mnth/6 mnth hazard ratio by actual treatment duration\* with associated non-inferiority p-values**

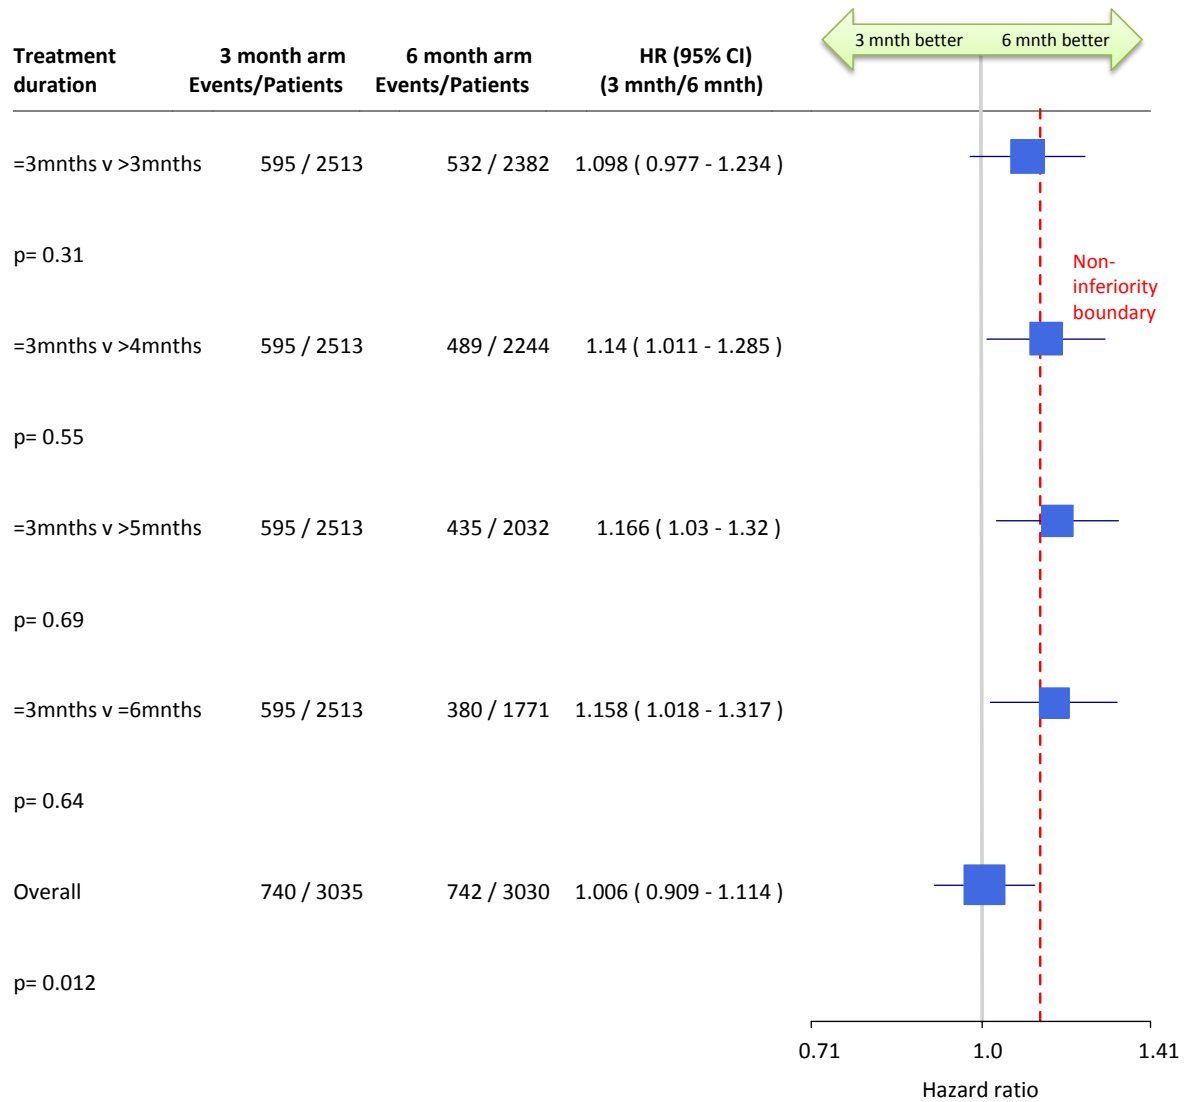

\* Analysis according to duration restricted to eligible patients who started treatment

Figure 2: EORTC global health status by randomised study arm

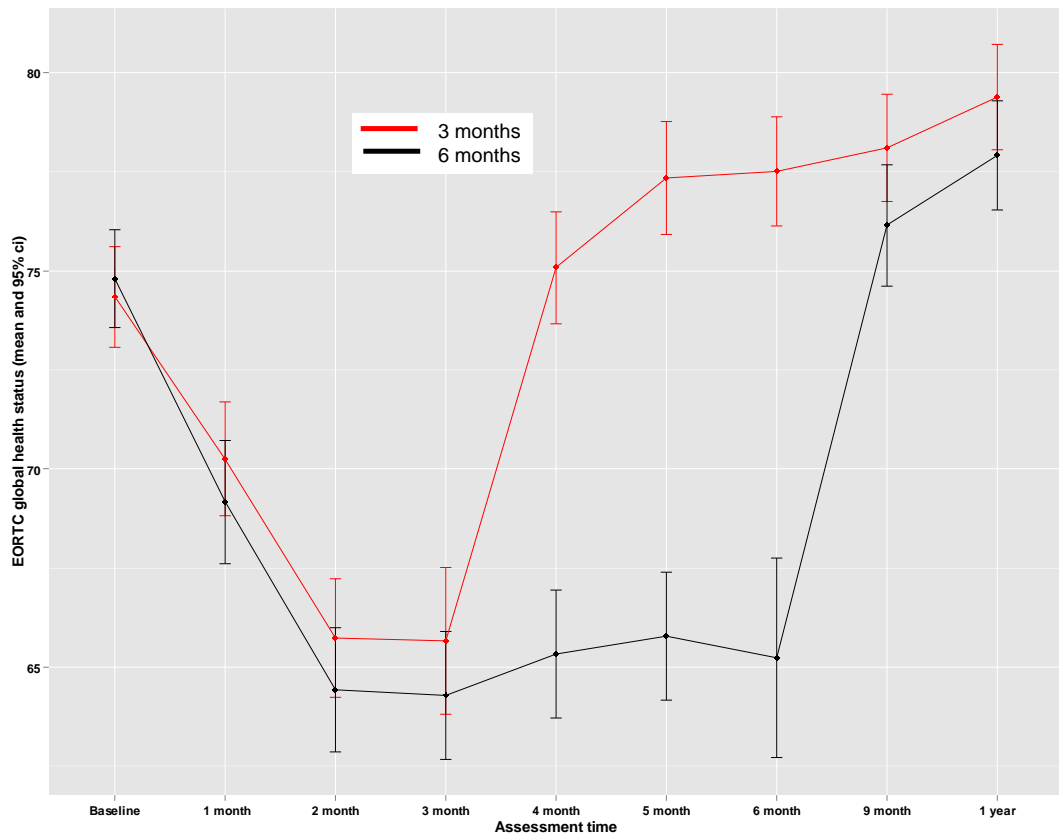

| Number of patients completing questionnaire |                     |          |         |         |         |         |         |         |            |        |
|---------------------------------------------|---------------------|----------|---------|---------|---------|---------|---------|---------|------------|--------|
|                                             |                     | Baseline | Month 1 | Month 2 | Month 3 | Month 4 | Month 5 | Month 6 | Month 9    | Year 1 |
| three months of treatment                   | N completed         | 796      | 719     | 660     | 456     | 543     | 522     | 509     | 642        | 593    |
|                                             | N expected          | 916      | 908     | 901     | 898     | 894     | 891     | 882     | 877        | 866    |
|                                             | % of those expected | 87%      | 79%     | 73%     | 51%     | 61%     | 59%     | 58%     | 73%        | 68%    |
| six months of treatment                     | N completed         | 794      | 677     | 664     | 597     | 554     | 504     | 204     | 554        | 582    |
|                                             | N expected          | 913      | 902     | 895     | 889     | 886     | 885     | 878     | 873        | 863    |
|                                             | % of those expected | 87%      | 75%     | 74%     | 67%     | 63%     | 57%     | 23%*    | 63%582/916 | 67%    |

\*Low return rate because patients assessed at start of last cycle rather than 6 months (which corresponds to end of cycle)

Figure 3: EQ-5D self-rated VAS by randomized study arm

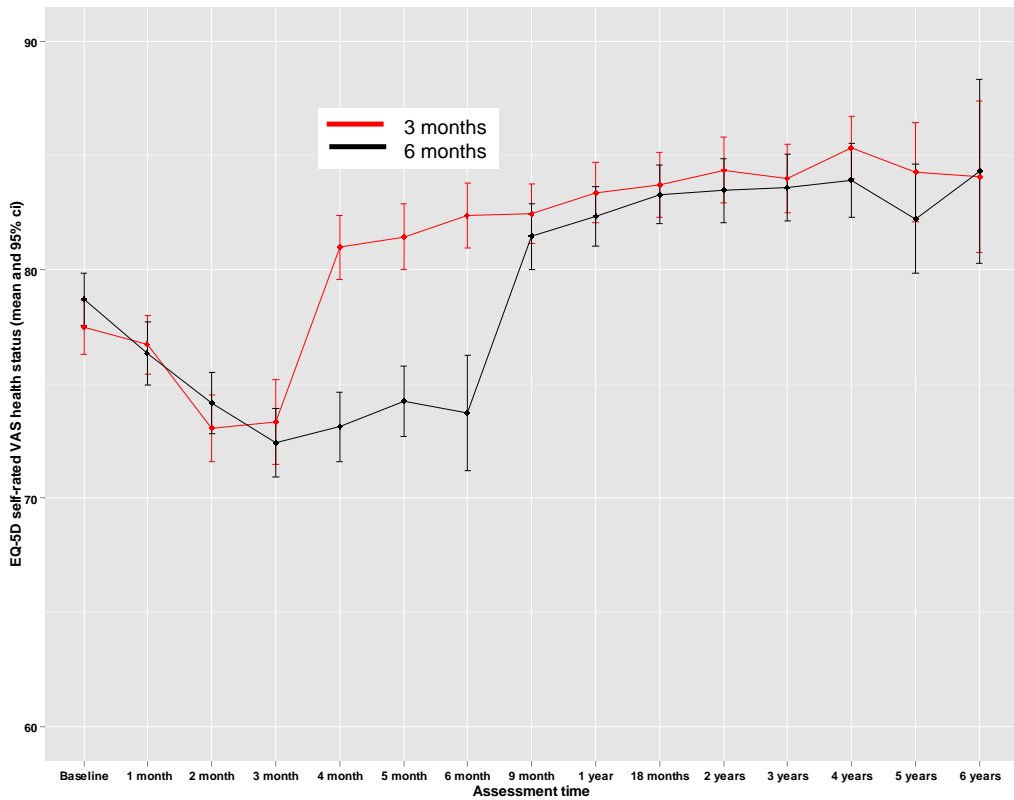

|                           |                     | Number of patients completing questionnaire |         |         |         |         |         |         |         |        |         |        |        |        |        |        |
|---------------------------|---------------------|---------------------------------------------|---------|---------|---------|---------|---------|---------|---------|--------|---------|--------|--------|--------|--------|--------|
|                           |                     | Baseline                                    | Month 1 | Month 2 | Month 3 | Month 4 | Month 5 | Month 6 | Month 9 | Year 1 | Mont 18 | Year 2 | Year 3 | Year 4 | Year 5 | Year 6 |
| three months of treatment | N completed         | 692                                         | 631     | 594     | 415     | 498     | 478     | 470     | 571     | 541    | 528     | 497    | 423    | 362    | 197    | 59     |
|                           | N expected          | 916                                         | 907     | 901     | 898     | 894     | 891     | 882     | 877     | 865    | 842     | 807    | 752    | 588    | 317    | 84     |
|                           | % of those expected | 76%                                         | 70%     | 66%     | 46%     | 56%     | 54%     | 53%     | 65%     | 63%    | 63%     | 62%    | 56%    | 62%    | 62%    | 70%    |
| six months of treatment   | N completed         | 695                                         | 599     | 591     | 543     | 509     | 457     | 186     | 497     | 541    | 512     | 492    | 408    | 341    | 191    | 58     |
|                           | N expected          | 912                                         | 902     | 895     | 889     | 886     | 884     | 878     | 873     | 862    | 848     | 815    | 761    | 617    | 319    | 86     |
|                           | % of those expected | 76%                                         | 66%     | 66%     | 61%     | 57%     | 52%     | 21%*    | 57%     | 63%    | 60%     | 60%    | 54%    | 55%    | 60%    | 67%    |

\*Low return rate because patients assessed at start of last cycle rather than 6 months (which corresponds to end of cycle)

Note that although results are available beyond year 6 they have been omitted because of small numbers and resultant wide confidence intervals

**Figure 4: Difference in quality of life scales between patients with "Quite a bit"/"Very much" numbness, tingling or discomfort in hands or feet on GOG NTX4 toxicity questionnaire and those who rated these symptoms as being present "Somewhat"/"A little bit" or "Not at all"**

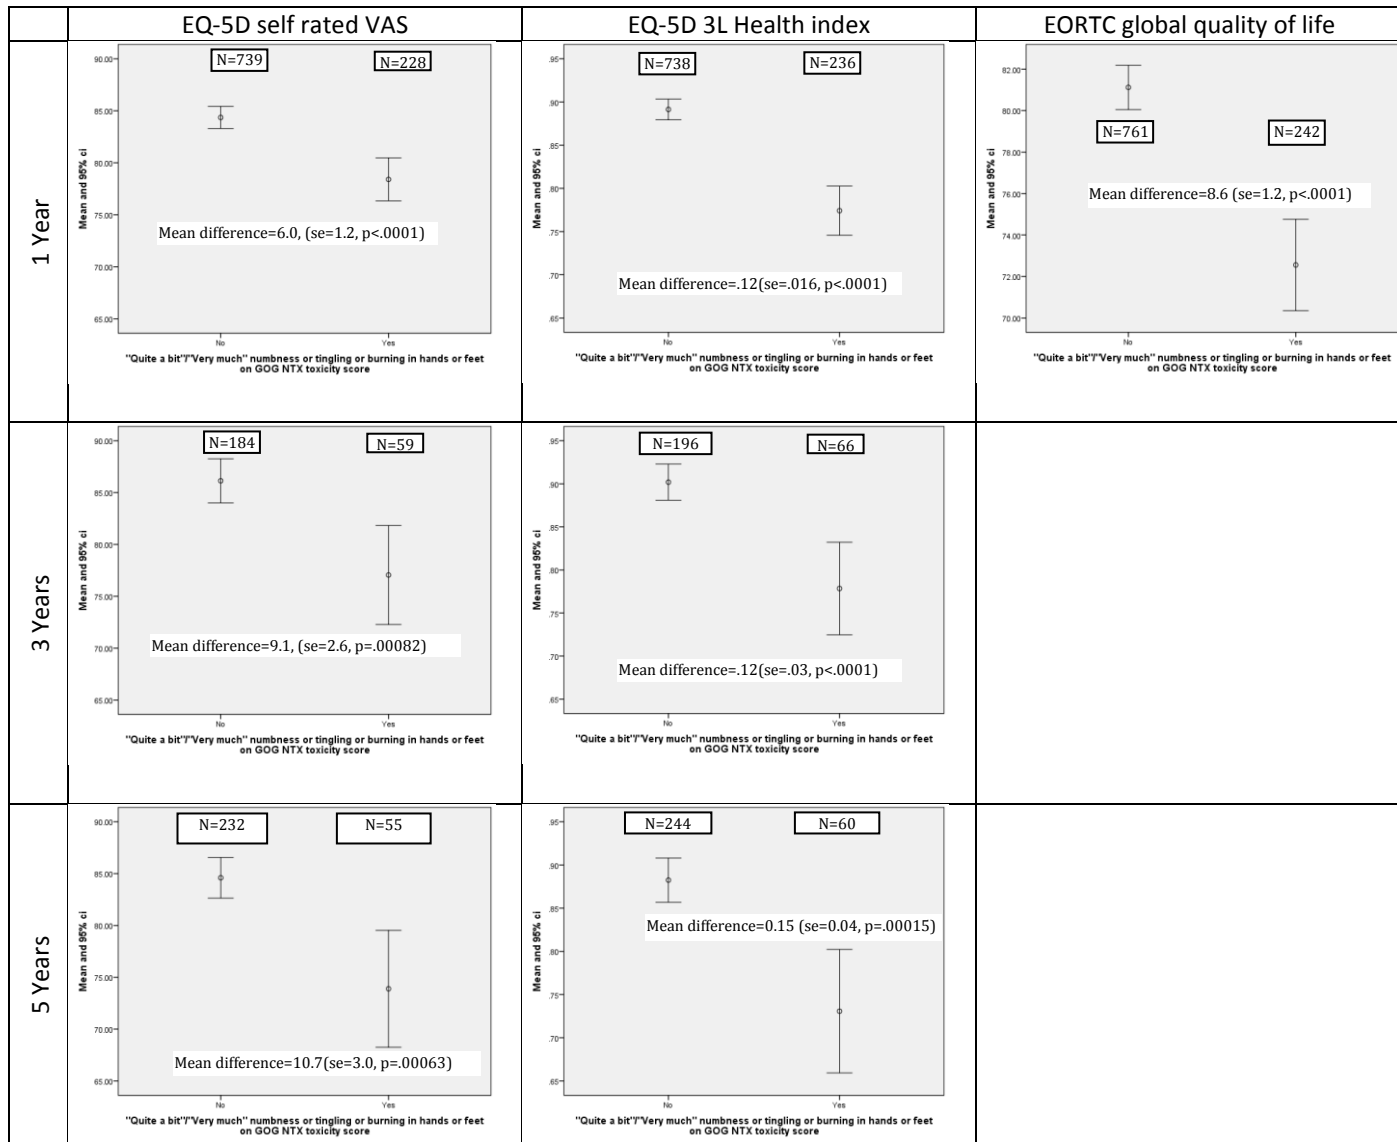

Figure 5: Kaplan-Meier plots of disease-free by study arm, regimen and stage III risk group

Low risk stage III (T1-3/N1)

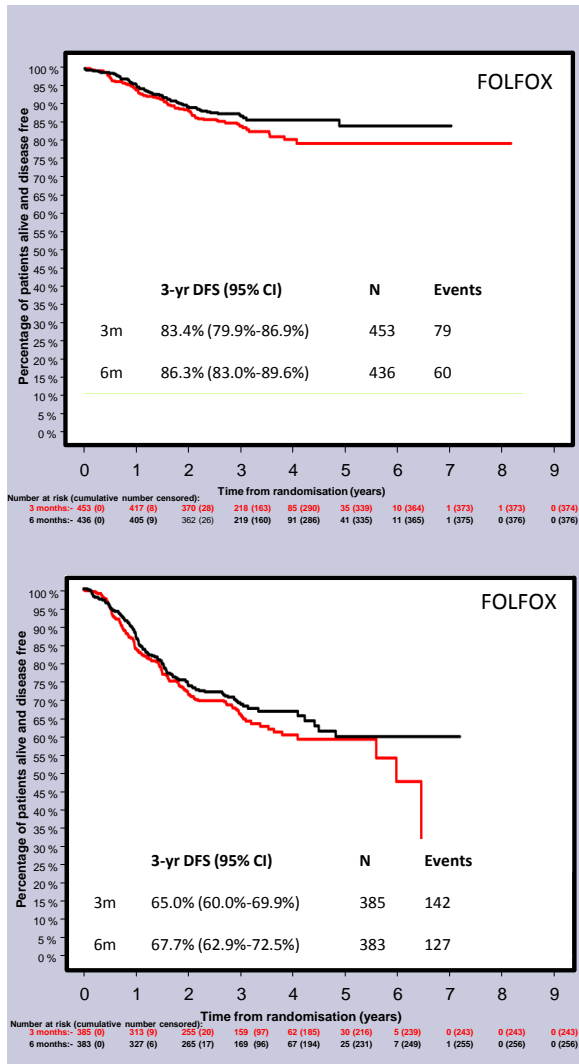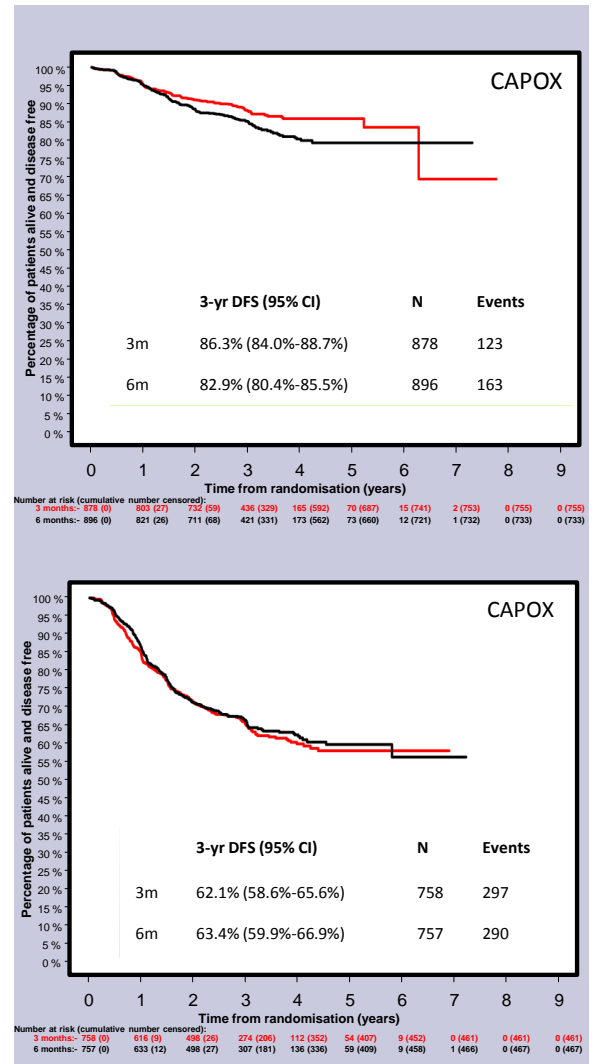

High risk stage III (T4 or N2)

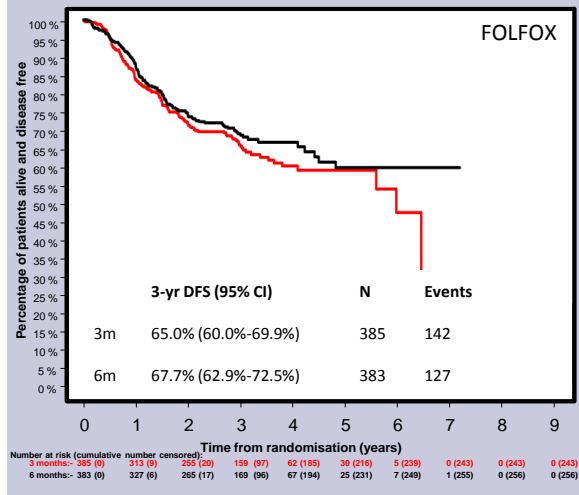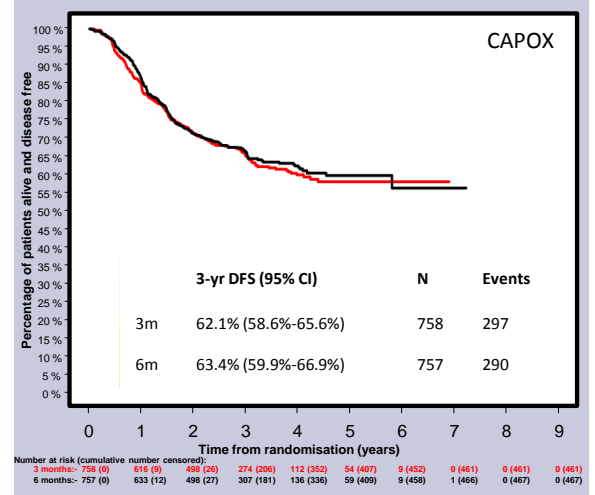

Figure 6: Percent grade 3/4/5 diarrhoea, hand-foot syndrome and neutropenia by study arm, and regimen

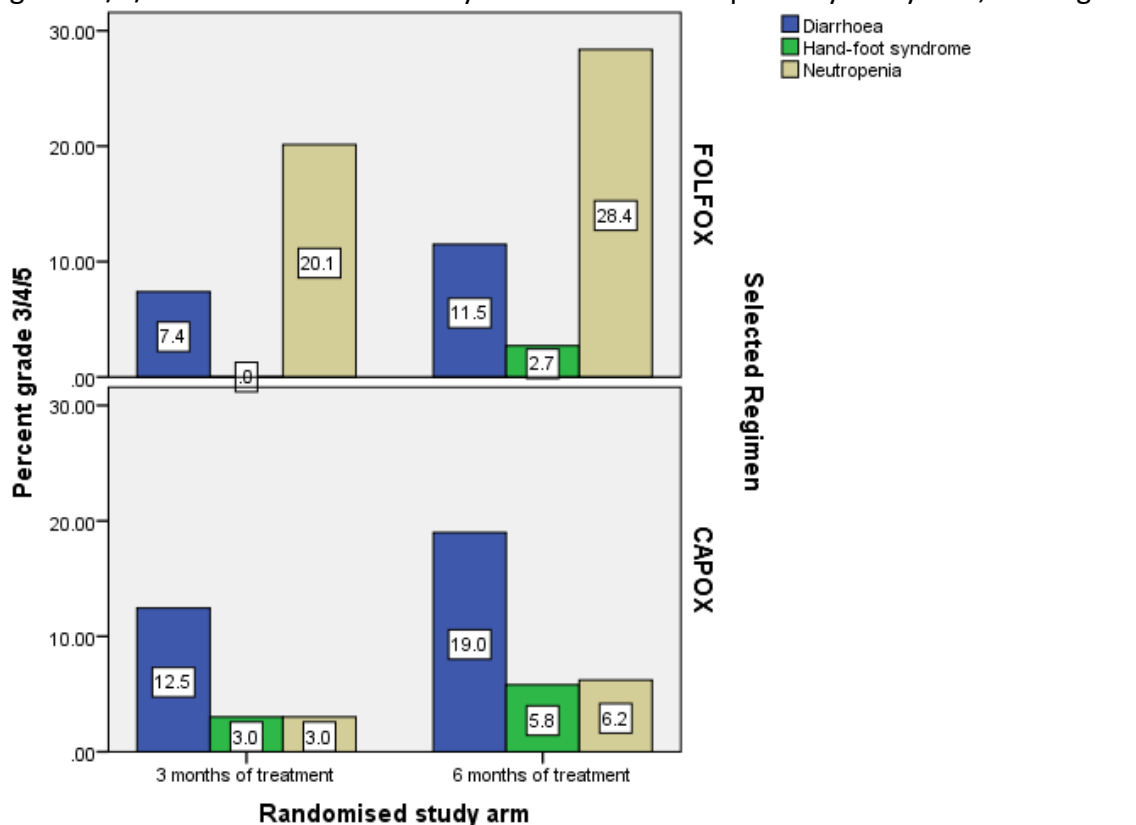

Table 1a: Patient characteristics for patients assessed by NCI CTC AE

|                                                 |                        | Randomised study arm  |       |                       |       |
|-------------------------------------------------|------------------------|-----------------------|-------|-----------------------|-------|
|                                                 |                        | 3 months of treatment |       | 6 months of treatment |       |
|                                                 |                        | Column N %            | Count | Column N %            | Count |
| Gender                                          | F                      | 38.2%                 | 166   | 38.0%                 | 165   |
|                                                 | M                      | 61.8%                 | 268   | 62.0%                 | 269   |
|                                                 | Total                  | 100.0%                | 434   | 100.0%                | 434   |
| Age at registration                             | Median                 | 63                    |       | 65                    |       |
|                                                 | Interquartile-range    | 59-69                 |       | 58-70                 |       |
|                                                 | Range                  | 27-83                 |       | 20-58                 |       |
|                                                 | N=                     | 434                   |       | 434                   |       |
| Performance status at randomisation             | 0                      | 63.6%                 | 276   | 60.6%                 | 263   |
|                                                 | 1                      | 36.4%                 | 158   | 39.4%                 | 171   |
|                                                 | Total                  | 100.0%                | 434   | 100.0%                | 434   |
| Disease site                                    | Colon                  | 81.6%                 | 354   | 81.8%                 | 355   |
|                                                 | Rectum                 | 18.4%                 | 80    | 18.2%                 | 79    |
|                                                 | Total                  | 100.0%                | 434   | 100.0%                | 434   |
| T-stage                                         | 0                      | 0.0%                  | 0     | 0.2%                  | 1     |
|                                                 | 1                      | 2.5%                  | 11    | 2.3%                  | 10    |
|                                                 | 2                      | 9.9%                  | 43    | 9.0%                  | 39    |
|                                                 | 3                      | 56.7%                 | 246   | 57.6%                 | 250   |
|                                                 | 4                      | 30.9%                 | 134   | 30.9%                 | 134   |
|                                                 | Total                  | 100.0%                | 434   | 100.0%                | 434   |
| N-stage                                         | 0                      | 13.4%                 | 58    | 12.9%                 | 56    |
|                                                 | 1                      | 57.6%                 | 250   | 58.8%                 | 255   |
|                                                 | 2                      | 29.0%                 | 126   | 28.3%                 | 123   |
|                                                 | Total                  | 100.0%                | 434   | 100.0%                | 434   |
| Planned treatment                               | FOLFOX                 | 35.7%                 | 155   | 36.4%                 | 158   |
|                                                 | CAPOX                  | 64.3%                 | 279   | 63.6%                 | 276   |
|                                                 | Total                  | 100.0%                | 434   | 100.0%                | 434   |
| If CAPOX planned, starting dose of Capecitabine | 750 mg/m <sup>2</sup>  | 27.8%                 | 5     | 22.7%                 | 5     |
|                                                 | 800 mg/m <sup>2</sup>  | 0.0%                  | 0     | 0.0%                  | 0     |
|                                                 | 1000 mg/m <sup>2</sup> | 72.2%                 | 13    | 77.3%                 | 17    |
|                                                 | Total                  | 100.0%                | 18    | 100.0%                | 22    |
| High risk stage II                              | No                     | 86.9%                 | 377   | 87.1%                 | 378   |
|                                                 | Yes                    | 13.1%                 | 57    | 12.9%                 | 56    |
|                                                 | Total                  | 100.0%                | 434   | 100.0%                | 434   |

Table 1b Patient characteristics for patients assessed on EQ-5D

|                                                 |                        | Randomised study arm  |       |                       |       |
|-------------------------------------------------|------------------------|-----------------------|-------|-----------------------|-------|
|                                                 |                        | 3 months of treatment |       | 6 months of treatment |       |
|                                                 |                        | Column N %            | Count | Column N %            | Count |
| Gender                                          | F                      | 39.4%                 | 361   | 39.8%                 | 363   |
|                                                 | M                      | 60.6%                 | 555   | 60.2%                 | 549   |
|                                                 | Total                  | 100.0%                | 916   | 100.0%                | 912   |
| Age at registration                             | 64                     |                       |       | 65                    |       |
|                                                 | 59-70                  |                       |       | 59-70                 |       |
|                                                 | 24-83                  |                       |       | 20-83                 |       |
|                                                 | Total                  | 916                   |       | 912                   |       |
| Performance status at randomisation             | 0                      | 65.0%                 | 595   | 63.7%                 | 581   |
|                                                 | 1                      | 35.0%                 | 321   | 36.3%                 | 331   |
|                                                 | Total                  | 100.0%                | 916   | 100.0%                | 912   |
| Disease site                                    | Colon                  | 82.4%                 | 755   | 82.2%                 | 750   |
|                                                 | Rectum                 | 17.6%                 | 161   | 17.8%                 | 162   |
|                                                 | Total                  | 100.0%                | 916   | 100.0%                | 912   |
| T-stage                                         | 0                      | 0.0%                  | 0     | 0.1%                  | 1     |
|                                                 | 1                      | 2.4%                  | 22    | 2.7%                  | 25    |
|                                                 | 2                      | 9.2%                  | 84    | 8.8%                  | 80    |
|                                                 | 3                      | 57.5%                 | 527   | 56.6%                 | 516   |
|                                                 | 4                      | 30.8%                 | 282   | 31.8%                 | 290   |
|                                                 | X                      | 0.1%                  | 1     | 0.0%                  | 0     |
|                                                 | Total                  | 100.0%                | 916   | 100.0%                | 912   |
| N-stage                                         | 0                      | 15.3%                 | 140   | 15.5%                 | 141   |
|                                                 | 1                      | 56.7%                 | 519   | 56.7%                 | 517   |
|                                                 | 2                      | 28.1%                 | 257   | 27.9%                 | 254   |
|                                                 | Total                  | 100.0%                | 916   | 100.0%                | 912   |
| Planned treatment                               | FOLFOX                 | 31.9%                 | 292   | 32.6%                 | 297   |
|                                                 | CAPOX                  | 68.1%                 | 624   | 67.4%                 | 615   |
|                                                 | Total                  | 100.0%                | 916   | 100.0%                | 912   |
| If CAPOX planned, starting dose of Capecitabine | 750 mg/m <sup>2</sup>  | 22.3%                 | 84    | 22.4%                 | 83    |
|                                                 | 800 mg/m <sup>2</sup>  | 4.8%                  | 18    | 4.9%                  | 18    |
|                                                 | 1000 mg/m <sup>2</sup> | 72.9%                 | 274   | 72.8%                 | 270   |
|                                                 | Total                  | 100.0%                | 376   | 100.0%                | 371   |
| High risk stage II                              | No                     | 84.9%                 | 778   | 84.9%                 | 774   |
|                                                 | Yes                    | 15.1%                 | 138   | 15.1%                 | 138   |
|                                                 | Total                  | 100.0%                | 916   | 100.0%                | 912   |



Table 1c: Patient characteristics for patients assessed on EORTC QLQ-C30/CR29

|                                                 |                     | Randomised study arm  |       |                       |       |
|-------------------------------------------------|---------------------|-----------------------|-------|-----------------------|-------|
|                                                 |                     | 3 months of treatment |       | 6 months of treatment |       |
|                                                 |                     | Column N %            | Count | Column N %            | Count |
| Gender                                          | F                   | 39.4%                 | 361   | 39.8%                 | 363   |
|                                                 | M                   | 60.6%                 | 555   | 60.2%                 | 550   |
|                                                 | Total               | 100.0%                | 916   | 100.0%                | 913   |
| Age at registration                             | Median              | 64                    |       | 65                    |       |
|                                                 | Interquartile range | 59-70                 |       | 59-70                 |       |
|                                                 | Range               | 24-83                 |       | 30-83                 |       |
|                                                 | N=                  | 916                   |       | 913                   |       |
| Performance status at randomisation             | 0                   | 65.0%                 | 595   | 63.7%                 | 582   |
|                                                 | 1                   | 35.0%                 | 321   | 36.3%                 | 331   |
|                                                 | Total               | 100.0%                | 916   | 100.0%                | 913   |
| Disease site                                    | Colon               | 82.4%                 | 755   | 82.3%                 | 751   |
|                                                 | Rectum              | 17.6%                 | 161   | 17.7%                 | 162   |
|                                                 | Total               | 100.0%                | 916   | 100.0%                | 913   |
| T-stage                                         | 0                   | 0.0%                  | 0     | 0.1%                  | 1     |
|                                                 | 1                   | 2.4%                  | 22    | 2.7%                  | 25    |
|                                                 | 2                   | 9.2%                  | 84    | 8.8%                  | 80    |
|                                                 | 3                   | 57.5%                 | 527   | 56.6%                 | 517   |
|                                                 | 4                   | 30.8%                 | 282   | 31.8%                 | 290   |
|                                                 | X                   | 0.1%                  | 1     | 0.0%                  | 0     |
|                                                 | Total               | 100.0%                | 916   | 100.0%                | 913   |
| N-stage                                         | 0                   | 15.3%                 | 140   | 15.4%                 | 141   |
|                                                 | 1                   | 56.7%                 | 519   | 56.7%                 | 518   |
|                                                 | 2                   | 28.1%                 | 257   | 27.8%                 | 254   |
|                                                 | Total               | 100.0%                | 916   | 100.0%                | 913   |
| Planned treatment                               | FOLFOX              | 31.9%                 | 292   | 32.5%                 | 297   |
|                                                 | CAPOX               | 68.1%                 | 624   | 67.5%                 | 616   |
|                                                 | Total               | 100.0%                | 916   | 100.0%                | 913   |
| If CAPOX planned, starting dose of Capecitabine | 750 mg/m2           | 22.3%                 | 84    | 22.6%                 | 84    |
|                                                 | 800 mg/m2           | 4.8%                  | 18    | 4.8%                  | 18    |
|                                                 | 1000 mg/m2          | 72.9%                 | 274   | 72.6%                 | 270   |
|                                                 | Total               | 100.0%                | 376   | 100.0%                | 372   |
| High risk stage II                              | No                  | 84.9%                 | 778   | 84.9%                 | 775   |
|                                                 | Yes                 | 15.1%                 | 138   | 15.1%                 | 138   |
|                                                 | Total               | 100.0%                | 916   | 100.0%                | 913   |

Table 1d Patient characteristics for patients assessed on GOG-NTX4

|                                                 |                        | Randomised study arm  |       |                       |       |
|-------------------------------------------------|------------------------|-----------------------|-------|-----------------------|-------|
|                                                 |                        | 3 months of treatment |       | 6 months of treatment |       |
|                                                 |                        | Column N %            | Count | Column N %            | Count |
| Gender                                          | F                      | 38.9%                 | 562   | 38.4%                 | 548   |
|                                                 | M                      | 61.1%                 | 883   | 61.6%                 | 878   |
|                                                 | Total                  | 100.0%                | 1445  | 100.0%                | 1426  |
| Age                                             | Median                 | 64                    |       | 65                    |       |
|                                                 | Interquartile-range    | 58-70                 |       | 59-70                 |       |
|                                                 | Range                  | 24-83                 |       | 20-85                 |       |
|                                                 | N=                     | 1445                  |       | 1426                  |       |
| Performance status at randomisation             | 0                      | 68.7%                 | 993   | 67.7%                 | 965   |
|                                                 | 1                      | 31.3%                 | 452   | 32.3%                 | 461   |
|                                                 | Total                  | 100.0%                | 1445  | 100.0%                | 1426  |
| Disease site                                    | Colon                  | 80.9%                 | 1169  | 81.0%                 | 1155  |
|                                                 | Rectum                 | 19.1%                 | 276   | 19.0%                 | 271   |
|                                                 | Total                  | 100.0%                | 1445  | 100.0%                | 1426  |
| T-stage                                         | 0                      | 0.0%                  | 0     | 0.1%                  | 1     |
|                                                 | 1                      | 2.4%                  | 35    | 2.9%                  | 42    |
|                                                 | 2                      | 9.2%                  | 133   | 8.8%                  | 126   |
|                                                 | 3                      | 57.5%                 | 831   | 56.5%                 | 806   |
|                                                 | 4                      | 30.8%                 | 445   | 31.6%                 | 451   |
|                                                 | X                      | 0.1%                  | 1     | 0.0%                  | 0     |
|                                                 | Total                  | 100.0%                | 1445  | 100.0%                | 1426  |
| N-stage                                         | 0                      | 16.1%                 | 232   | 16.1%                 | 230   |
|                                                 | 1                      | 57.4%                 | 830   | 57.2%                 | 816   |
|                                                 | 2                      | 26.5%                 | 383   | 26.6%                 | 380   |
|                                                 | Total                  | 100.0%                | 1445  | 100.0%                | 1426  |
| Planned treatment                               | FOLFOX                 | 32.3%                 | 467   | 32.1%                 | 458   |
|                                                 | Capox                  | 67.7%                 | 978   | 67.9%                 | 968   |
|                                                 | Total                  | 100.0%                | 1445  | 100.0%                | 1426  |
| If CAPOX planned, starting dose of Capecitabine | 750 mg/m <sup>2</sup>  | 21.8%                 | 159   | 20.6%                 | 149   |
|                                                 | 800 mg/m <sup>2</sup>  | 3.8%                  | 28    | 4.1%                  | 30    |
|                                                 | 1000 mg/m <sup>2</sup> | 74.4%                 | 543   | 75.3%                 | 545   |
|                                                 | Total                  | 100.0%                | 730   | 100.0%                | 724   |
| High risk stage II                              | No                     | 84.1%                 | 1215  | 84.1%                 | 1199  |
|                                                 | Yes                    | 15.9%                 | 230   | 15.9%                 | 227   |
|                                                 | Total                  | 100.0%                | 1445  | 100.0%                | 1426  |

Table 2: Causes of death

|                |                            | Randomised study arm  |            |                       |            |
|----------------|----------------------------|-----------------------|------------|-----------------------|------------|
|                |                            | 3 months of treatment |            | 6 months of treatment |            |
|                |                            | Count                 | Column N % | Count                 | Column N % |
| Cause of death | N/A - Alive                | 2642                  | 87.1%      | 2636                  | 87.0%      |
|                | Colorectal cancer          | 277                   | 9.1%       | 274                   | 9.0%       |
|                | Protocol treatment related | 16                    | .5%        | 16                    | .5%        |
|                | Other cancer               | 22                    | .7%        | 20                    | .7%        |
|                | Other treatment related    | 1                     | .0%        | 1                     | .0%        |
|                | Other causes               | 46                    | 1.5%       | 48                    | 1.6%       |
|                | Unknown                    | 31                    | 1.0%       | 35                    | 1.2%       |
|                | Total                      | 3035                  | 100.0%     | 3030                  | 100.0%     |

Table 3: Details of protocol treatment related causes of death

|                      |                       |    | Patient ID | Description of protocol treatment related cause of death      |  |
|----------------------|-----------------------|----|------------|---------------------------------------------------------------|--|
| Randomised study arm | 3 months of treatment | 1  | 100        | SEPTIC SHOCK AND MULTI-ORGAN FAILURE                          |  |
|                      |                       | 2  | 414        | PULMONARY EMBOLISM                                            |  |
|                      |                       | 3  | 550        | CARDIAC ARREST                                                |  |
|                      |                       | 4  | 1147       | NEUTROPENIC SEPSIS, MULTI ORGAN FAILURE                       |  |
|                      |                       | 5  | 1585       | PULMONARY FIBROSIS POSSIBLY RELATED TO OXALIPLATIN            |  |
|                      |                       | 6  | 1995       | POST MORTEM RESULT - ISCHEMIC HEART DISEASE                   |  |
|                      |                       | 7  | 2036       | MYOCARDIAL INFARCTION RELATED TO CAPECITABINE.                |  |
|                      |                       | 8  | 2767       | PORTAL VEIN THROMBOSIS                                        |  |
|                      |                       | 9  | 2886       | MULTIPLE ORGAN FAILURE SECONDARY TO NEUTROPENIC SEPSIS        |  |
|                      |                       | 10 | 3174       | PULMONARY EMBOLISM                                            |  |
|                      |                       | 11 | 3675       | CARDIAC ARREST, CORONARY ARTERY SPASM RELATED TO CAPECITABINE |  |
|                      |                       | 12 | 3945       | MULTI ORGAN FAILURE                                           |  |
|                      |                       | 13 | 4077       | PULMONARY EMBOLISM                                            |  |
|                      |                       | 14 | 4285       | FOUND DEAD AT HOME - NO POST MORTEM CARRIED OUT               |  |
|                      |                       | 15 | 5355       | CARDIAC ISCHEMIA INFARCTION                                   |  |
|                      |                       | 16 | 5921       | ISCHAEMIC BOWEL                                               |  |
|                      | Total N               | 16 |            | 16                                                            |  |
|                      | 6 months of treatment | 1  | 385        | SEPTIC SHOCK DUE TO NEUTROPENIA                               |  |
|                      |                       | 2  | 492        | PULMONARY EMBOLISM, DEEP VEIN THROMBOSIS                      |  |
|                      |                       | 3  | 562        | CAUSE OF DEATH IS CHEMOTHERAPY FOR RECTAL ADENOCARCINOMA      |  |
|                      |                       | 4  | 1419       | PULMONARY FIBROSIS SECONDARY TO OXALIPLATIN                   |  |
|                      |                       | 5  | 1532       | DIARRHOEA + NEUTROPENIA RESULTING IN MULTI ORGAN FAILURE      |  |
|                      |                       | 6  | 1771       | MYOCARDIAL INSUFFICIENCY? CAPECITABINE RELATED                |  |
|                      |                       | 7  | 1856       | INTRACRANIAL BLEED                                            |  |
|                      |                       | 8  | 2175       | 1A) ARRHYTHMIA, 1B) CHEMOTHERAPY INFUSION FOR COLON CANCER    |  |
|                      |                       | 9  | 3752       | MYOCARDIAL INFARCTION                                         |  |
|                      |                       | 10 | 4200       | MULTI-ORGAN FAILURE DUE TO AORTIC THROMBOSIS                  |  |
|                      |                       | 11 | 4258       | MULTI-ORGAN FAILURE                                           |  |
|                      |                       | 12 | 4721       | ASPIRATION PNEUMONIA AND TYPE II DIABETES                     |  |
|                      |                       | 13 | 4846       | PERFORATION                                                   |  |
|                      |                       | 14 | 5168       | BILATERAL PULMONARY EMBOLISM                                  |  |
|                      |                       | 15 | 5629       | DIARRHOEA CAUSE BY CAPECITABINE INDUCED COLITIS               |  |
|                      |                       | 16 | 5702       | MYOCARDIAL INFARCTION                                         |  |
|                      | Total N               | 16 |            | 16                                                            |  |
| Total                | N                     | 32 |            | 32                                                            |  |

**Table 4: Serious adverse reactions by body system (only for events that effect  $\geq 1\%$  of patients in either arm)**

| Body System                 | Randomised study arm  |       |                       |       | P-value |
|-----------------------------|-----------------------|-------|-----------------------|-------|---------|
|                             | 3 months of treatment |       | 6 months of treatment |       |         |
|                             | Column N %            | Count | Column N %            | Count |         |
| BLOOD/BONE MARROW           | 1.5%                  | 45    | 1.8%                  | 54    | .42     |
| CARDIAC GENERAL             | 1.6%                  | 48    | 1.4%                  | 42    | .53     |
| CONSTITUTIONAL SYMPTOMS     | 3.3%                  | 100   | 3.5%                  | 104   | .83     |
| GASTROINTESTINAL            | 7.9%                  | 238   | 8.6%                  | 260   | .33     |
| INFECTION                   | 2.4%                  | 72    | 2.9%                  | 86    | .30     |
| METABOLIC/LABORATORY        | 1.2%                  | 35    | 1.2%                  | 35    | 1.00    |
| NEUROLOGY                   | 1.2%                  | 36    | 1.5%                  | 46    | .32     |
| PAIN                        | 2.2%                  | 65    | 3.1%                  | 94    | .024    |
| PULMONARY/UPPER RESPIRATORY | 0.9%                  | 27    | 1.5%                  | 45    | .043    |
| VASCULAR                    | 1.3%                  | 38    | 2.1%                  | 64    | .012    |
| Total                       | 100.0%                | 3009  | 100.0%                | 3013  |         |

**Table 5: Maximum NCI CTC grade of toxicity recorded during treatment by randomised study arm (for toxicities with an overall incidence <10%, but at least one toxicity ≥3)**

|                                            | Randomised study arm          |               |       |               |       |               |       |               |       |               |         |                               |       |               |       |               |       |               |       |               |       |               |         |               |
|--------------------------------------------|-------------------------------|---------------|-------|---------------|-------|---------------|-------|---------------|-------|---------------|---------|-------------------------------|-------|---------------|-------|---------------|-------|---------------|-------|---------------|-------|---------------|---------|---------------|
|                                            | 3 months of treatment (n=434) |               |       |               |       |               |       |               |       |               |         | 6 months of treatment (n=434) |       |               |       |               |       |               |       |               |       |               |         |               |
|                                            | 0                             |               | 1-2   |               | 3     |               | 4     |               | 5     |               | Missing |                               | 0     |               | 1-2   |               | 3     |               | 4     |               | 5     |               | Missing |               |
|                                            | Count                         | Row Valid N % | Count | Row Valid N % | Count | Row Valid N % | Count | Row Valid N % | Count | Row Valid N % | Count   | Row Valid N %                 | Count | Row Valid N % | Count | Row Valid N % | Count | Row Valid N % | Count | Row Valid N % | Count | Row Valid N % | Count   | Row Valid N % |
| Allergic reaction                          | 419                           | 99.8%         | 0     | 0.0%          | 1     | 0.2%          | 0     | 0.0%          | 0     | 0.0%          | 14      | 3.1%                          | 399   | 97.6%         | 8     | 2.0%          | 2     | 0.5%          | 0     | 0.0%          | 0     | 0.0%          | 25      | 5.8%          |
| Allergy - Other (Specify)                  | 419                           | 99.8%         | 1     | 0.2%          | 0     | 0.0%          | 0     | 0.0%          | 0     | 0.0%          | 14      | 3.1%                          | 406   | 99.3%         | 1     | 0.2%          | 2     | 0.5%          | 0     | 0.0%          | 0     | 0.0%          | 0       | 0.0%          |
| ALT                                        | 411                           | 97.9%         | 9     | 2.1%          | 0     | 0.0%          | 0     | 0.0%          | 0     | 0.0%          | 14      | 3.4%                          | 392   | 95.8%         | 16    | 3.9%          | 1     | 0.2%          | 0     | 0.0%          | 0     | 0.0%          | 25      | 5.8%          |
| Ascites                                    | 420                           | 100.0%        | 0     | 0.0%          | 0     | 0.0%          | 0     | 0.0%          | 0     | 0.0%          | 14      | 3.3%                          | 408   | 99.8%         | 0     | 0.0%          | 1     | 0.2%          | 0     | 0.0%          | 0     | 0.0%          | 0       | 0.0%          |
| Bilirubin                                  | 413                           | 98.3%         | 7     | 1.7%          | 0     | 0.0%          | 0     | 0.0%          | 0     | 0.0%          | 14      | 3.4%                          | 400   | 97.8%         | 8     | 2.0%          | 1     | 0.2%          | 0     | 0.0%          | 0     | 0.0%          | 0       | 0.0%          |
| Blood - Other (Specify)                    | 418                           | 99.5%         | 2     | 0.5%          | 0     | 0.0%          | 0     | 0.0%          | 0     | 0.0%          | 14      | 3.3%                          | 403   | 98.5%         | 5     | 1.2%          | 1     | 0.2%          | 0     | 0.0%          | 0     | 0.0%          | 25      | 5.8%          |
| Blurred vision                             | 417                           | 99.3%         | 3     | 0.7%          | 0     | 0.0%          | 0     | 0.0%          | 0     | 0.0%          | 14      | 3.3%                          | 400   | 97.8%         | 9     | 2.2%          | 0     | 0.0%          | 0     | 0.0%          | 0     | 0.0%          | 0       | 0.0%          |
| Bronchospasm                               | 419                           | 99.8%         | 1     | 0.2%          | 0     | 0.0%          | 0     | 0.0%          | 0     | 0.0%          | 14      | 3.1%                          | 407   | 99.5%         | 1     | 0.2%          | 1     | 0.2%          | 0     | 0.0%          | 0     | 0.0%          | 25      | 5.8%          |
| Cardiac General - Other (Specify)          | 417                           | 99.3%         | 1     | 0.2%          | 2     | 0.5%          | 0     | 0.0%          | 0     | 0.0%          | 14      | 3.2%                          | 407   | 99.5%         | 1     | 0.2%          | 1     | 0.2%          | 0     | 0.0%          | 0     | 0.0%          | 25      | 5.8%          |
| Cardiac ischemia/infarction                | 419                           | 99.8%         | 0     | 0.0%          | 1     | 0.2%          | 0     | 0.0%          | 0     | 0.0%          | 14      | 3.1%                          | 406   | 99.3%         | 1     | 0.2%          | 2     | 0.5%          | 0     | 0.0%          | 0     | 0.0%          | 0       | 0.0%          |
| Cardiopulmonary arrest                     | 420                           | 100.0%        | 0     | 0.0%          | 0     | 0.0%          | 0     | 0.0%          | 0     | 0.0%          | 14      | 3.3%                          | 408   | 99.8%         | 0     | 0.0%          | 0     | 0.0%          | 0     | 0.0%          | 1     | 0.2%          | 25      | 5.8%          |
| Cholecystitis                              | 420                           | 100.0%        | 0     | 0.0%          | 0     | 0.0%          | 0     | 0.0%          | 0     | 0.0%          | 14      | 3.3%                          | 408   | 99.8%         | 0     | 0.0%          | 1     | 0.2%          | 0     | 0.0%          | 0     | 0.0%          | 25      | 5.8%          |
| CNS ischemia                               | 419                           | 99.8%         | 0     | 0.0%          | 0     | 0.0%          | 1     | 0.2%          | 0     | 0.0%          | 14      | 3.1%                          | 409   | 100.0%        | 0     | 0.0%          | 0     | 0.0%          | 0     | 0.0%          | 0     | 0.0%          | 25      | 5.8%          |
| Colitis                                    | 418                           | 99.5%         | 1     | 0.2%          | 1     | 0.2%          | 0     | 0.0%          | 0     | 0.0%          | 14      | 3.2%                          | 407   | 99.5%         | 2     | 0.5%          | 0     | 0.0%          | 0     | 0.0%          | 0     | 0.0%          | 25      | 5.8%          |
| Cough                                      | 414                           | 98.6%         | 6     | 1.4%          | 0     | 0.0%          | 0     | 0.0%          | 0     | 0.0%          | 14      | 3.1%                          | 394   | 96.3%         | 14    | 3.4%          | 1     | 0.2%          | 0     | 0.0%          | 0     | 0.0%          | 25      | 5.8%          |
| Creatinine                                 | 418                           | 99.5%         | 2     | 0.5%          | 0     | 0.0%          | 0     | 0.0%          | 0     | 0.0%          | 14      | 3.3%                          | 404   | 98.8%         | 4     | 1.0%          | 1     | 0.2%          | 0     | 0.0%          | 0     | 0.0%          | 25      | 5.8%          |
| Dehydration                                | 414                           | 98.6%         | 1     | 0.2%          | 5     | 1.2%          | 0     | 0.0%          | 0     | 0.0%          | 14      | 3.1%                          | 399   | 97.6%         | 3     | 0.7%          | 7     | 1.7%          | 0     | 0.0%          | 0     | 0.0%          | 25      | 5.8%          |
| Dermatitis - Select                        | 420                           | 100.0%        | 0     | 0.0%          | 0     | 0.0%          | 0     | 0.0%          | 0     | 0.0%          | 14      | 3.3%                          | 407   | 99.5%         | 1     | 0.2%          | 1     | 0.2%          | 0     | 0.0%          | 0     | 0.0%          | 25      | 5.8%          |
| Distension                                 | 416                           | 99.0%         | 4     | 1.0%          | 0     | 0.0%          | 0     | 0.0%          | 0     | 0.0%          | 14      | 3.1%                          | 407   | 99.5%         | 2     | 0.5%          | 0     | 0.0%          | 0     | 0.0%          | 0     | 0.0%          | 25      | 5.8%          |
| Dizziness                                  | 411                           | 97.9%         | 9     | 2.1%          | 0     | 0.0%          | 0     | 0.0%          | 0     | 0.0%          | 14      | 3.4%                          | 389   | 95.1%         | 18    | 4.4%          | 2     | 0.5%          | 0     | 0.0%          | 0     | 0.0%          | 25      | 5.8%          |
| Dysphagia                                  | 418                           | 99.5%         | 2     | 0.5%          | 0     | 0.0%          | 0     | 0.0%          | 0     | 0.0%          | 14      | 3.2%                          | 404   | 98.8%         | 5     | 1.2%          | 0     | 0.0%          | 0     | 0.0%          | 0     | 0.0%          | 25      | 5.8%          |
| Dyspnea                                    | 403                           | 96.0%         | 15    | 3.6%          | 1     | 0.2%          | 1     | 0.2%          | 0     | 0.0%          | 14      | 3.1%                          | 382   | 93.4%         | 22    | 5.4%          | 4     | 1.0%          | 1     | 0.2%          | 0     | 0.0%          | 25      | 5.8%          |
| Edema larynx                               | 420                           | 100.0%        | 0     | 0.0%          | 0     | 0.0%          | 0     | 0.0%          | 0     | 0.0%          | 14      | 3.3%                          | 408   | 99.8%         | 1     | 0.2%          | 0     | 0.0%          | 0     | 0.0%          | 0     | 0.0%          | 25      | 5.8%          |
| Edema: trunk/genital                       | 419                           | 99.8%         | 0     | 0.0%          | 1     | 0.2%          | 0     | 0.0%          | 0     | 0.0%          | 14      | 3.1%                          | 409   | 100.0%        | 0     | 0.0%          | 0     | 0.0%          | 0     | 0.0%          | 0     | 0.0%          | 25      | 5.8%          |
| Enteritis                                  | 420                           | 100.0%        | 0     | 0.0%          | 0     | 0.0%          | 0     | 0.0%          | 0     | 0.0%          | 14      | 3.3%                          | 407   | 99.5%         | 1     | 0.2%          | 1     | 0.2%          | 0     | 0.0%          | 0     | 0.0%          | 25      | 5.8%          |
| Febrile neutropenia                        | 417                           | 99.3%         | 0     | 0.0%          | 1     | 0.2%          | 1     | 0.2%          | 1     | 0.2%          | 14      | 3.2%                          | 409   | 100.0%        | 0     | 0.0%          | 0     | 0.0%          | 0     | 0.0%          | 0     | 0.0%          | 25      | 5.8%          |
| Fever                                      | 415                           | 98.8%         | 4     | 1.0%          | 1     | 0.2%          | 0     | 0.0%          | 0     | 0.0%          | 14      | 3.2%                          | 389   | 95.1%         | 20    | 4.9%          | 0     | 0.0%          | 0     | 0.0%          | 0     | 0.0%          | 25      | 5.8%          |
| Flatulence                                 | 413                           | 98.3%         | 7     | 1.7%          | 0     | 0.0%          | 0     | 0.0%          | 0     | 0.0%          | 14      | 3.4%                          | 403   | 98.5%         | 5     | 1.2%          | 1     | 0.2%          | 0     | 0.0%          | 0     | 0.0%          | 25      | 5.8%          |
| Fracture                                   | 420                           | 100.0%        | 0     | 0.0%          | 0     | 0.0%          | 0     | 0.0%          | 0     | 0.0%          | 14      | 3.3%                          | 408   | 99.8%         | 0     | 0.0%          | 1     | 0.2%          | 0     | 0.0%          | 0     | 0.0%          | 25      | 5.8%          |
| Gait/walking                               | 420                           | 100.0%        | 0     | 0.0%          | 0     | 0.0%          | 0     | 0.0%          | 0     | 0.0%          | 14      | 3.3%                          | 408   | 99.8%         | 0     | 0.0%          | 1     | 0.2%          | 0     | 0.0%          | 0     | 0.0%          | 25      | 5.8%          |
| Gastritis                                  | 420                           | 100.0%        | 0     | 0.0%          | 0     | 0.0%          | 0     | 0.0%          | 0     | 0.0%          | 14      | 3.3%                          | 407   | 99.5%         | 1     | 0.2%          | 1     | 0.2%          | 0     | 0.0%          | 0     | 0.0%          | 25      | 5.8%          |
| GI - Other (Specify)                       | 410                           | 97.6%         | 8     | 1.9%          | 2     | 0.5%          | 0     | 0.0%          | 0     | 0.0%          | 14      | 3.1%                          | 392   | 95.8%         | 14    | 3.4%          | 3     | 0.7%          | 0     | 0.0%          | 0     | 0.0%          | 25      | 5.8%          |
| Heartburn                                  | 401                           | 95.5%         | 19    | 4.5%          | 0     | 0.0%          | 0     | 0.0%          | 0     | 0.0%          | 14      | 3.1%                          | 387   | 94.6%         | 21    | 5.1%          | 1     | 0.2%          | 0     | 0.0%          | 0     | 0.0%          | 25      | 5.8%          |
| Hemorrhage GI - Select                     | 414                           | 98.6%         | 5     | 1.2%          | 1     | 0.2%          | 0     | 0.0%          | 0     | 0.0%          | 14      | 3.1%                          | 405   | 99.0%         | 4     | 1.0%          | 0     | 0.0%          | 0     | 0.0%          | 0     | 0.0%          | 25      | 5.8%          |
| Hiccoughs                                  | 416                           | 99.0%         | 4     | 1.0%          | 0     | 0.0%          | 0     | 0.0%          | 0     | 0.0%          | 14      | 3.1%                          | 402   | 98.3%         | 7     | 1.7%          | 0     | 0.0%          | 0     | 0.0%          | 0     | 0.0%          | 25      | 5.8%          |
| Hyperglycemia                              | 419                           | 99.8%         | 0     | 0.0%          | 1     | 0.2%          | 0     | 0.0%          | 0     | 0.0%          | 14      | 3.1%                          | 408   | 99.8%         | 0     | 0.0%          | 1     | 0.2%          | 0     | 0.0%          | 0     | 0.0%          | 25      | 5.8%          |
| Hyperuricemia                              | 419                           | 99.8%         | 0     | 0.0%          | 1     | 0.2%          | 0     | 0.0%          | 0     | 0.0%          | 14      | 3.1%                          | 408   | 99.8%         | 1     | 0.2%          | 0     | 0.0%          | 0     | 0.0%          | 0     | 0.0%          | 25      | 5.8%          |
| Hypoalbuminemia                            | 410                           | 97.6%         | 9     | 2.1%          | 1     | 0.2%          | 0     | 0.0%          | 0     | 0.0%          | 14      | 3.1%                          | 402   | 98.3%         | 7     | 1.7%          | 0     | 0.0%          | 0     | 0.0%          | 0     | 0.0%          | 25      | 5.8%          |
| Hypocalcemia                               | 417                           | 99.3%         | 2     | 0.5%          | 0     | 0.0%          | 1     | 0.2%          | 0     | 0.0%          | 14      | 3.2%                          | 406   | 99.3%         | 3     | 0.7%          | 0     | 0.0%          | 0     | 0.0%          | 0     | 0.0%          | 25      | 5.8%          |
| Hypoglycemia                               | 419                           | 99.8%         | 1     | 0.2%          | 0     | 0.0%          | 0     | 0.0%          | 0     | 0.0%          | 14      | 3.1%                          | 407   | 99.5%         | 0     | 0.0%          | 2     | 0.5%          | 0     | 0.0%          | 0     | 0.0%          | 25      | 5.8%          |
| Hypokalemia                                | 411                           | 97.9%         | 6     | 1.4%          | 2     | 0.5%          | 1     | 0.2%          | 0     | 0.0%          | 14      | 3.1%                          | 398   | 97.3%         | 9     | 2.2%          | 1     | 0.2%          | 1     | 0.2%          | 0     | 0.0%          | 25      | 5.8%          |
| Hyponatremia                               | 417                           | 99.3%         | 1     | 0.2%          | 2     | 0.5%          | 0     | 0.0%          | 0     | 0.0%          | 14      | 3.2%                          | 402   | 98.3%         | 5     | 1.2%          | 2     | 0.5%          | 0     | 0.0%          | 0     | 0.0%          | 25      | 5.8%          |
| Hypophosphatemia                           | 417                           | 99.3%         | 1     | 0.2%          | 2     | 0.5%          | 0     | 0.0%          | 0     | 0.0%          | 14      | 3.2%                          | 408   | 99.8%         | 1     | 0.2%          | 0     | 0.0%          | 0     | 0.0%          | 0     | 0.0%          | 25      | 5.8%          |
| Hypotension                                | 419                           | 99.8%         | 1     | 0.2%          | 0     | 0.0%          | 0     | 0.0%          | 0     | 0.0%          | 14      | 3.1%                          | 409   | 100.0%        | 0     | 0.0%          | 0     | 0.0%          | 0     | 0.0%          | 0     | 0.0%          | 25      | 5.8%          |
| Infection - Other (Specify)                | 397                           | 94.5%         | 20    | 4.8%          | 3     | 0.7%          | 0     | 0.0%          | 0     | 0.0%          | 14      | 3.5%                          | 377   | 92.2%         | 26    | 6.4%          | 6     | 1.5%          | 0     | 0.0%          | 0     | 0.0%          | 25      | 5.8%          |
| Infection (documented clinically) - Select | 418                           | 99.5%         | 1     | 0.2%          | 1     | 0.2%          | 0     | 0.0%          | 0     | 0.0%          | 14      | 3.2%                          | 405   | 99.0%         | 2     | 0.5%          | 2     | 0.5%          | 0     | 0.0%          | 0     | 0.0%          | 25      | 5.8%          |
| Infection with normal ANC - Select         | 409                           | 97.4%         | 7     | 1.7%          | 3     | 0.7%          | 1     | 0.2%          | 0     | 0.0%          | 14      | 3.1%                          | 397   | 97.1%         | 8     | 2.0%          | 4     | 1.0%          | 0     | 0.0%          | 0     | 0.0%          | 25      | 5.8%          |
| INR                                        | 418                           | 99.5%         | 0     | 0.0%          | 2     | 0.5%          | 0     | 0.0%          | 0     | 0.0%          | 14      | 3.2%                          | 409   | 100.0%        | 0     | 0.0%          | 0     | 0.0%          | 0     | 0.0%          | 0     | 0.0%          | 25      | 5.8%          |
| Insomnia                                   | 401                           | 95.5%         | 19    | 4.5%          | 0     | 0.0%          | 0     | 0.0%          | 0     | 0.0%          | 14      | 3.5%                          | 384   | 93.9%         | 25    | 6.1%          | 0     | 0.0%          | 0     | 0.0%          | 0     | 0.0%          | 25      | 5.8%          |
| Iron overload                              | 420                           | 100.0%        | 0     | 0.0%          | 0     | 0.0%          | 0     | 0.0%          | 0     | 0.0%          | 14      | 3.3%                          | 409   | 100.0%        | 0     | 0.0%          | 0     | 0.0%          | 0     | 0.0%          | 0     | 0.0%          | 25      | 5.8%          |

|                                       | Randomised study arm          |               |       |               |       |               |       |               |       |               |         |                               |       |               |       |               |       |               |       |               |       |               |         |               |    |   |
|---------------------------------------|-------------------------------|---------------|-------|---------------|-------|---------------|-------|---------------|-------|---------------|---------|-------------------------------|-------|---------------|-------|---------------|-------|---------------|-------|---------------|-------|---------------|---------|---------------|----|---|
|                                       | 3 months of treatment (n=434) |               |       |               |       |               |       |               |       |               |         | 6 months of treatment (n=434) |       |               |       |               |       |               |       |               |       |               |         |               |    |   |
|                                       | 0                             |               | 1-2   |               | 3     |               | 4     |               | 5     |               | Missing |                               | 0     |               | 1-2   |               | 3     |               | 4     |               | 5     |               | Missing |               |    |   |
|                                       | Count                         | Row Valid N % | Count | Row Valid N % | Count | Row Valid N % | Count | Row Valid N % | Count | Row Valid N % | Count   | Row Valid N %                 | Count | Row Valid N % | Count | Row Valid N % | Count | Row Valid N % | Count | Row Valid N % | Count | Row Valid N % | Count   | Row Valid N % |    |   |
| Joint-effusion                        | 419                           | 99.8%         | 0     | 0.0%          | 0     | 0.0%          | 1     | 0.2%          | 0     | 0.0%          | 14      | -                             | 409   | 100.0%        | 0     | 0.0%          | 0     | 0.0%          | 0     | 0.0%          | 0     | 0.0%          | 25      | -             |    |   |
| Joint-function                        | 419                           | 99.8%         | 1     | 0.2%          | 0     | 0.0%          | 0     | 0.0%          | 0     | 0.0%          | 14      | -                             | 406   | 99.3%         | 2     | 0.5%          | 1     | 0.2%          | 0     | 0.0%          | 0     | 0.0%          | 0       | 0.0%          | 25 | - |
| Laryngeal nerve                       | 417                           | 99.3%         | 2     | 0.5%          | 1     | 0.2%          | 0     | 0.0%          | 0     | 0.0%          | 14      | -                             | 404   | 98.8%         | 5     | 1.2%          | 0     | 0.0%          | 0     | 0.0%          | 0     | 0.0%          | 0       | 0.0%          | 25 | - |
| Leukocytes                            | 415                           | 98.8%         | 4     | 1.0%          | 1     | 0.2%          | 0     | 0.0%          | 0     | 0.0%          | 14      | -                             | 402   | 98.3%         | 7     | 1.7%          | 0     | 0.0%          | 0     | 0.0%          | 0     | 0.0%          | 0       | 0.0%          | 25 | - |
| Mental status                         | 420                           | 100.0%        | 0     | 0.0%          | 0     | 0.0%          | 0     | 0.0%          | 0     | 0.0%          | 14      | -                             | 408   | 99.8%         | 0     | 0.0%          | 1     | 0.2%          | 0     | 0.0%          | 0     | 0.0%          | 0       | 0.0%          | 25 | - |
| Mood alteration - Select              | 405                           | 96.4%         | 14    | 3.3%          | 1     | 0.2%          | 0     | 0.0%          | 0     | 0.0%          | 14      | -                             | 393   | 96.1%         | 12    | 2.9%          | 4     | 1.0%          | 0     | 0.0%          | 0     | 0.0%          | 0       | 0.0%          | 25 | - |
| Muscle weakness - Select              | 420                           | 100.0%        | 0     | 0.0%          | 0     | 0.0%          | 0     | 0.0%          | 0     | 0.0%          | 14      | -                             | 404   | 98.8%         | 4     | 1.0%          | 1     | 0.2%          | 0     | 0.0%          | 0     | 0.0%          | 0       | 0.0%          | 25 | - |
| Neurology - Other (Specify)           | 411                           | 97.9%         | 8     | 1.9%          | 1     | 0.2%          | 0     | 0.0%          | 0     | 0.0%          | 14      | -                             | 396   | 96.8%         | 12    | 2.9%          | 1     | 0.2%          | 0     | 0.0%          | 0     | 0.0%          | 0       | 0.0%          | 25 | - |
| Obstruction GI                        | 420                           | 100.0%        | 0     | 0.0%          | 0     | 0.0%          | 0     | 0.0%          | 0     | 0.0%          | 14      | -                             | 407   | 99.5%         | 1     | 0.2%          | 1     | 0.2%          | 0     | 0.0%          | 0     | 0.0%          | 0       | 0.0%          | 25 | - |
| Ocular - Other (Specify)              | 417                           | 99.3%         | 3     | 0.7%          | 0     | 0.0%          | 0     | 0.0%          | 0     | 0.0%          | 14      | -                             | 402   | 98.3%         | 6     | 1.5%          | 1     | 0.2%          | 0     | 0.0%          | 0     | 0.0%          | 0       | 0.0%          | 25 | - |
| Personality                           | 419                           | 99.8%         | 1     | 0.2%          | 0     | 0.0%          | 0     | 0.0%          | 0     | 0.0%          | 14      | -                             | 408   | 99.8%         | 0     | 0.0%          | 1     | 0.2%          | 0     | 0.0%          | 0     | 0.0%          | 0       | 0.0%          | 25 | - |
| Phlebitis                             | 414                           | 98.6%         | 6     | 1.4%          | 0     | 0.0%          | 0     | 0.0%          | 0     | 0.0%          | 14      | -                             | 396   | 96.8%         | 12    | 2.9%          | 1     | 0.2%          | 0     | 0.0%          | 0     | 0.0%          | 0       | 0.0%          | 25 | - |
| Pneumonitis                           | 420                           | 100.0%        | 0     | 0.0%          | 0     | 0.0%          | 0     | 0.0%          | 0     | 0.0%          | 14      | -                             | 407   | 99.5%         | 1     | 0.2%          | 1     | 0.2%          | 0     | 0.0%          | 0     | 0.0%          | 0       | 0.0%          | 25 | - |
| Psychosis                             | 418                           | 99.5%         | 1     | 0.2%          | 0     | 0.0%          | 0     | 0.0%          | 0     | 0.0%          | 14      | -                             | 409   | 100.0%        | 0     | 0.0%          | 0     | 0.0%          | 0     | 0.0%          | 0     | 0.0%          | 0       | 0.0%          | 25 | - |
| Pulmonary - Other (Specify)           | 413                           | 98.3%         | 4     | 1.0%          | 2     | 0.5%          | 1     | 0.2%          | 0     | 0.0%          | 14      | -                             | 401   | 98.0%         | 7     | 1.7%          | 0     | 0.0%          | 1     | 0.2%          | 0     | 0.0%          | 0       | 0.0%          | 25 | - |
| Renal - Other (Specify)               | 418                           | 99.5%         | 2     | 0.5%          | 0     | 0.0%          | 0     | 0.0%          | 0     | 0.0%          | 14      | -                             | 406   | 99.3%         | 2     | 0.5%          | 1     | 0.2%          | 0     | 0.0%          | 0     | 0.0%          | 0       | 0.0%          | 25 | - |
| Renal failure                         | 416                           | 99.0%         | 0     | 0.0%          | 4     | 1.0%          | 0     | 0.0%          | 0     | 0.0%          | 14      | -                             | 409   | 100.0%        | 0     | 0.0%          | 0     | 0.0%          | 0     | 0.0%          | 0     | 0.0%          | 0       | 0.0%          | 25 | - |
| Supraventricular arrhythmia - Select  | 418                           | 99.5%         | 2     | 0.5%          | 0     | 0.0%          | 0     | 0.0%          | 0     | 0.0%          | 14      | -                             | 406   | 99.3%         | 2     | 0.5%          | 1     | 0.2%          | 0     | 0.0%          | 0     | 0.0%          | 0       | 0.0%          | 25 | - |
| Syncope (fainting)                    | 419                           | 99.8%         | 0     | 0.0%          | 1     | 0.2%          | 0     | 0.0%          | 0     | 0.0%          | 14      | -                             | 407   | 99.5%         | 0     | 0.0%          | 2     | 0.5%          | 0     | 0.0%          | 0     | 0.0%          | 0       | 0.0%          | 25 | - |
| Syndromes - Other (Specify)           | 419                           | 99.8%         | 0     | 0.0%          | 1     | 0.2%          | 0     | 0.0%          | 0     | 0.0%          | 14      | -                             | 409   | 100.0%        | 0     | 0.0%          | 0     | 0.0%          | 0     | 0.0%          | 0     | 0.0%          | 0       | 0.0%          | 25 | - |
| Thrombosis/embolism (vascular access) | 413                           | 98.3%         | 1     | 0.2%          | 6     | 1.4%          | 0     | 0.0%          | 0     | 0.0%          | 14      | -                             | 407   | 99.5%         | 0     | 0.0%          | 1     | 0.2%          | 1     | 0.2%          | 0     | 0.0%          | 0       | 0.0%          | 25 | - |
| Thrombosis/thrombus/embolism          | 410                           | 97.6%         | 2     | 0.5%          | 3     | 0.7%          | 4     | 1.0%          | 1     | 0.2%          | 14      | -                             | 396   | 96.8%         | 1     | 0.2%          | 3     | 0.7%          | 8     | 2.0%          | 1     | 0.2%          | 1       | 0.2%          | 25 | - |
| Tinnitus                              | 417                           | 99.3%         | 2     | 0.5%          | 1     | 0.2%          | 0     | 0.0%          | 0     | 0.0%          | 14      | -                             | 408   | 99.8%         | 1     | 0.2%          | 0     | 0.0%          | 0     | 0.0%          | 0     | 0.0%          | 0       | 0.0%          | 25 | - |
| Urinary frequency                     | 420                           | 100.0%        | 0     | 0.0%          | 0     | 0.0%          | 0     | 0.0%          | 0     | 0.0%          | 14      | -                             | 406   | 99.3%         | 3     | 0.7%          | 0     | 0.0%          | 0     | 0.0%          | 0     | 0.0%          | 0       | 0.0%          | 25 | - |
| Vascular - Other (Specify)            | 417                           | 99.3%         | 2     | 0.5%          | 1     | 0.2%          | 0     | 0.0%          | 0     | 0.0%          | 14      | -                             | 403   | 98.5%         | 4     | 1.0%          | 1     | 0.2%          | 1     | 0.2%          | 0     | 0.0%          | 0       | 0.0%          | 25 | - |
| Vasovagal episode                     | 419                           | 99.8%         | 0     | 0.0%          | 1     | 0.2%          | 0     | 0.0%          | 0     | 0.0%          | 14      | -                             | 408   | 99.8%         | 1     | 0.2%          | 0     | 0.0%          | 0     | 0.0%          | 0     | 0.0%          | 0       | 0.0%          | 25 | - |
| Voice changes                         | 420                           | 100.0%        | 0     | 0.0%          | 0     | 0.0%          | 0     | 0.0%          | 0     | 0.0%          | 14      | -                             | 407   | 99.5%         | 1     | 0.2%          | 1     | 0.2%          | 0     | 0.0%          | 0     | 0.0%          | 0       | 0.0%          | 25 | - |
| Weight loss                           | 414                           | 98.6%         | 6     | 1.4%          | 0     | 0.0%          | 0     | 0.0%          | 0     | 0.0%          | 14      | -                             | 401   | 98.0%         | 7     | 1.7%          | 1     | 0.2%          | 0     | 0.0%          | 0     | 0.0%          | 0       | 0.0%          | 25 | - |
| Wound complication non-infectious     | 419                           | 99.8%         | 0     | 0.0%          | 1     | 0.2%          | 0     | 0.0%          | 0     | 0.0%          | 14      | -                             | 408   | 99.8%         | 1     | 0.2%          | 0     | 0.0%          | 0     | 0.0%          | 0     | 0.0%          | 0       | 0.0%          | 25 | - |

**Table 6: Differences between study arms in selected<sup>1</sup> quality of life scales at month 6 and month 12**

| Scale                              | Standardised adjusted AUC p-value (p-value adjusted for multiple testing) | Difference at 6 months <sup>2</sup> (95% ci) | Difference at 12 months <sup>2</sup> (95% ci) |
|------------------------------------|---------------------------------------------------------------------------|----------------------------------------------|-----------------------------------------------|
| EORTC QLQ C30 Global Health Status |                                                                           |                                              |                                               |
| Global Health Status               | p<.0001 (p<.0001)                                                         | 11.58 (9.62-13.54)                           | 1.48 (-.19 -3.14)                             |
| EORTC QLQ C30 functional scales    |                                                                           |                                              |                                               |
| Cognitive                          | p<.0001 (p<.0001)                                                         | 7.10 (5.09 – 9.10)                           | 2.05 (.31 – 3.79)                             |
| Emotional                          | p<.0001 (p<.0001)                                                         | 7.77 (5.71 – 9.83)                           | 1.56 (-.19 – 3.32)                            |
| Physical                           | p<.0001 (p<.0001)                                                         | 8.53 (6.43 – 10.63)                          | 1.47 (.04 – 2.90)                             |
| Role                               | p<.0001 (p<.0001)                                                         | 17.47 (14.94 -20.00)                         | 3.79 (1.71 – 5.87)                            |
| Social                             | p<.0001 (p<.0001)                                                         | 11.80 (8.59 – 15.01)                         | 1.97 (0.29 – 3.64)                            |
| EORTC QLQ C30 symptom scales       |                                                                           |                                              |                                               |
| Fatigue                            | p<.0001 (p<.0001)                                                         | -15.31 (-18.48,-12.15)                       | -2.10 (-3.93,-.27)                            |
| Nausea and vomiting                | p<.0001 (p<.0001)                                                         | -7.00 (-8.70, -5.30)                         | -.57 (-1.41,0.26)                             |
| Pain                               | p<.0001 (p<.0001)                                                         | -6.52 (-8.41, -4.63)                         | -.43 (-2.10, 1.24)                            |
| Dyspnoea                           | p=.00053 (p=.012)                                                         | -6.82 (-10.00, -3.64)                        | 0.59 (-1.61, 2.79)                            |
| Insomnia                           | p<.0001 (p=.00014)                                                        | -8.78 (-11.15, -6.41)                        | -.32 (-3.10, 2.46)                            |
| Appetite loss                      | p<.0001 (p<.0001)                                                         | -14.86 (-17.08, -12.64)                      | -.08 (-1.35, 1.20)                            |
| Constipation                       | p=.0014 (p=.030)                                                          | -6.52 (-9.12, -3.93)                         | -.01 (-1.68, 1.67)                            |
| Diarrhoea                          | P<.0001 (p=.00025)                                                        | -7.72 (-9.78, -5.86)                         | -.34 (-2.09, 1.41)                            |
| Financial problems                 | p<.0001 (p=.00053)                                                        | -6.29 (-9.50, -3.08)                         | -.78 (-2.93, 1.37)                            |
| EORTC QLQ CR29                     |                                                                           |                                              |                                               |
| Body image                         | p=.0019 (p=.037)                                                          | -5.42 (-7.24, -3.60)                         | -.66 (-2.43, 1.11)                            |
| Hair loss                          | p=.0017 (p=.035)                                                          | -7.78 (-10.89, -4.66)                        | -.73 (-2.19, .73)                             |
| Dry mouth                          | p<.0001 (p<.0001)                                                         | -17.69 (-20.97, -14.41)                      | -.08 (-1.35, 1.20)                            |
| Taste                              | p<.0001 (p<.0001)                                                         | -25.71 (-28.58, -22.83)                      | -.67 (-2.23, .90)                             |
| EQ-5D                              |                                                                           |                                              |                                               |
| Visual analogue scale              | p=.00081 (p=.00081)                                                       | 9.80 (7.76 – 11.84)                          | 1.45 (-.27 – 3.18)                            |
| Health index                       | p=.00056 (p=.00081)                                                       | 0.102 (.069 - .135)                          | .015 (-.009, .039)                            |

1. Those where the difference in standardised adjusted AUC was statistically significant at 5% after adjustment for multiple testing
2. 3 month arm-6 month arm



Table 7: Reasons for missing questionnaires as recorded on study CRF

## a) EORTC Questionnaire

|                                         | ARM      |            |          |            |
|-----------------------------------------|----------|------------|----------|------------|
|                                         | 3 months |            | 6 months |            |
|                                         | Count    | Column N % | Count    | Column N % |
| Complete                                | 6629     | 81.4%      | 7420     | 80.2%      |
| Patient refused                         | 175      | 2.1%       | 168      | 1.8%       |
| Patient relapsed/evidence of new tumour | 56       | 0.7%       | 53       | 0.6%       |
| Patient unfit                           | 33       | 0.4%       | 46       | 0.5%       |
| Other                                   | 1233     | 15.1%      | 1542     | 16.7%      |
| Not required                            | 19       | 0.2%       | 28       | 0.3%       |

## b) EQ5D Questionnaire

|                                         | ARM      |            |          |            |
|-----------------------------------------|----------|------------|----------|------------|
|                                         | 3 months |            | 6 months |            |
|                                         | Count    | Column N % | Count    | Column N % |
| Complete                                | 8924     | 76.2%      | 9684     | 75.3%      |
| Patient refused                         | 256      | 2.2%       | 273      | 2.1%       |
| Patient relapsed/evidence of new tumour | 213      | 1.8%       | 181      | 1.4%       |
| Patient unfit                           | 73       | 0.6%       | 89       | 0.7%       |
| Other                                   | 2204     | 18.8%      | 2573     | 20.0%      |
| Not required                            | 46       | 0.4%       | 55       | 0.4%       |

## c) GOG NTX4 Questionnaire

|                                         | ARM      |            |          |            |
|-----------------------------------------|----------|------------|----------|------------|
|                                         | 3 months |            | 6 months |            |
|                                         | Count    | Column N % | Count    | Column N % |
| Complete                                | 9658     | 64.4%      | 10858    | 65.6%      |
| Patient refused                         | 263      | 1.8%       | 281      | 1.7%       |
| Patient relapsed/evidence of new tumour | 190      | 1.3%       | 187      | 1.1%       |
| Patient unfit                           | 74       | 0.5%       | 101      | 0.6%       |
| Other                                   | 2890     | 19.3%      | 3255     | 19.7%      |
| Not required                            | 1924     | 12.8%      | 1871     | 11.3%      |

It can be seen that the reasons are broadly similar between the study arms with the most common reason being "other". Examination of a random sample of the free text on the CRF's when the reason for "other" was entered indicates that in the vast majority of cases this was an error of some sort (form not returned, site error, patient forgot etc.). The high proportion of "not required" for GOG-NTX4 is due to administrative delay in implementing the amendment to extend the recording period for the questionnaire.

Table 8: Missing questionnaire (Yes/No) by baseline factors

|                    |        | EORTC Missing |         |       |         | EQ-5D Missing |         |       |         | GOG-NTX4 Missing |         |       |         |
|--------------------|--------|---------------|---------|-------|---------|---------------|---------|-------|---------|------------------|---------|-------|---------|
|                    |        | No            |         | Yes   |         | No            |         | Yes   |         | No               |         | Yes   |         |
|                    |        | Count         | Row N % | Count | Row N % | Count         | Row N % | Count | Row N % | Count            | Row N % | Count | Row N % |
| Gender             | F      | 5371          | 79.8%   | 1362  | 20.2%   | 7103          | 74.9%   | 2376  | 25.1%   | 7753             | 64.4%   | 4286  | 35.6%   |
|                    | M      | 8678          | 81.3%   | 1991  | 18.7%   | 11505         | 76.2%   | 3587  | 23.8%   | 12763            | 65.4%   | 6750  | 34.6%   |
| Age-group          | <=50   | 1326          | 81.3%   | 304   | 18.7%   | 1715          | 75.1%   | 570   | 24.9%   | 1940             | 65.4%   | 1026  | 34.6%   |
|                    | <=70   | 9529          | 80.9%   | 2250  | 19.1%   | 12666         | 76.2%   | 3958  | 23.8%   | 13961            | 65.0%   | 7503  | 35.0%   |
|                    | >70    | 3194          | 80.0%   | 799   | 20.0%   | 4227          | 74.7%   | 1435  | 25.3%   | 4615             | 64.8%   | 2507  | 35.2%   |
| Performance status | 0      | 9259          | 80.6%   | 2222  | 19.4%   | 12190         | 75.4%   | 3980  | 24.6%   | 14112            | 65.4%   | 7451  | 34.6%   |
|                    | 1      | 4790          | 80.9%   | 1131  | 19.1%   | 6418          | 76.4%   | 1983  | 23.6%   | 6404             | 64.1%   | 3585  | 35.9%   |
| T-stage            | X/0/1  | 406           | 77.3%   | 119   | 22.7%   | 536           | 74.5%   | 183   | 25.5%   | 583              | 63.9%   | 330   | 36.1%   |
|                    | 2      | 1278          | 81.2%   | 296   | 18.8%   | 1710          | 76.8%   | 518   | 23.2%   | 1888             | 65.6%   | 991   | 34.4%   |
|                    | 3      | 8082          | 81.7%   | 1811  | 18.3%   | 10783         | 76.8%   | 3250  | 23.2%   | 11866            | 65.7%   | 6200  | 34.3%   |
|                    | 4      | 4283          | 79.2%   | 1127  | 20.8%   | 5579          | 73.5%   | 2012  | 26.5%   | 6179             | 63.7%   | 3515  | 36.3%   |
| N-stage            | 0      | 2121          | 82.5%   | 451   | 17.5%   | 3072          | 77.2%   | 908   | 22.8%   | 3566             | 66.3%   | 1810  | 33.7%   |
|                    | 1      | 8004          | 81.1%   | 1863  | 18.9%   | 10514         | 76.2%   | 3287  | 23.8%   | 11724            | 65.5%   | 6172  | 34.5%   |
|                    | 2      | 3924          | 79.1%   | 1039  | 20.9%   | 5022          | 74.0%   | 1768  | 26.0%   | 5226             | 63.1%   | 3054  | 36.9%   |
| Treatment          | FOLFOX | 5479          | 82.1%   | 1197  | 17.9%   | 6935          | 76.8%   | 2090  | 23.2%   | 7897             | 67.7%   | 3765  | 32.3%   |
|                    | CAPOX  | 8570          | 79.9%   | 2156  | 20.1%   | 11673         | 75.1%   | 3873  | 24.9%   | 12619            | 63.4%   | 7271  | 36.6%   |

The table above shows the %-age missing for the PRO questionnaires across baseline patient characteristics. It can be seen that the percentage missing is very similar across the categories of the baseline characteristics with the difference being in general very small and never exceeding 5%.

Table 9: Sensitivity analysis of PRO results

|                                              | Imputed (as in manuscript)<br><i>Mean (se)</i> | Observed data only<br><i>Mean (se)</i> | Imputed (restricted to patients who completed baseline questionnaire)<br><i>Mean (se)</i> |
|----------------------------------------------|------------------------------------------------|----------------------------------------|-------------------------------------------------------------------------------------------|
| <b>GOG NTX questionnaire</b>                 |                                                |                                        |                                                                                           |
| Difference <sup>#</sup> at 6 months          | -1.99 (.17)**                                  | -2.31 (.35)**                          | -2.16 (.28)**                                                                             |
| Difference at 12 months                      | -2.48 (.15)**                                  | -2.54 (.23)**                          | -2.30 (.20)**                                                                             |
| Difference at 5 years                        | -2.07 (.33)**                                  | -1.90 (.42)**                          | -1.90 (.34)**                                                                             |
| <b>EORTC- QLQ-C30 global quality of life</b> |                                                |                                        |                                                                                           |
| Difference at 6 months                       | 11.58 (1.00)**                                 | 12.00 (1.41)**                         | 12.72 (1.82)**                                                                            |
| Difference at 12 months                      | 1.48 (.85)~                                    | 1.57 (.99)~                            | 1.22 (.86)~                                                                               |
| <b>EQ-5D Visual Analogue Scale</b>           |                                                |                                        |                                                                                           |
| Difference at 6 months                       | 9.80 (1.04)**                                  | 7.05 (1.52)**                          | 7.36 (0.90)**                                                                             |
| Difference at 12 months                      | 1.45 (.88)~                                    | 1.68 (.96)~                            | 1.31 (1.00)~                                                                              |

# Difference 3 months -6 months; \*\*P<.001. ~P>.05

The tables above summarises the comparison of the three most important PRO end-points at key time-points. The first column is taken from the imputation analysis as presented in the paper, the second column is based on observed data and the last column is based on an imputation restricted to patients who completed a baseline questionnaire. This last analysis was done to ensure that the analysis set could not be influenced by a patient's subsequent experience on the study (for example patients who should have completed at baseline but were missed and subsequently completed a follow-up form because they developed neurotoxicity are omitted from this analysis).

At all time-points the mean differences are similar and completely consistent in terms of statistical significance.

| SCOT SITE PRINCIPAL INVESTIGATOR RECRUITMENT |                                                             |                        |
|----------------------------------------------|-------------------------------------------------------------|------------------------|
| SITE NAME                                    | PRINCIPAL INVESTIGATOR(S)                                   | TOTAL RE-<br>CRUITMENT |
| BEATSON WEST OF SCOTLAND CANCER CENTRE       | PROFESSOR JIM CASSIDY<br>DR ASHITA WATERSON                 | 141                    |
| ROYAL UNITED HOSPITAL BATH                   | DR GARETH REES<br>DR LOUISE MEDLEY<br>DR EMMA DE WINTON     | 111                    |
| ADDENBROOKES HOSPITAL                        | DR CHARLES WILSON                                           | 97                     |
| ROYAL CORNWALL HOSPITAL                      | DR RICHARD ELLIS                                            | 94                     |
| ROYAL SURREY COUNTY HOSPITAL                 | DR GARY MIDDLETON<br>DR SHARADAH ESSAPEN                    | 93                     |
| CASTLE HILL HOSPITAL                         | DR AMANDEEP DHADDA                                          | 91                     |
| MOUNT VERNON HOSPITAL                        | DR ROB HUGHES                                               | 89                     |
| BRISTOL ONCOLOGY CENTRE                      | DR STEPHEN FALK                                             | 85                     |
| QUEENS HOSPITAL                              | DR SHERIF RAOUF                                             | 83                     |
| SOUTHAMPTON GENERAL HOSPITAL                 | DR TIMOTHY IVESON                                           | 81                     |
| WESTERN GENERAL HOSPITAL                     | DR LESLEY DAWSON                                            | 80                     |
| CHRISTIE HOSPITAL NHS TRUST                  | DR MARK SAUNDERS                                            | 77                     |
| SALISBURY DISTRICT HOSPITAL                  | DR TIMOTHY IVESON<br>DR ALAAELDIN SHABLAH                   | 77                     |
| VELINDRE NHS TRUST HOSPITAL                  | DR ALISON BREWSTER                                          | 76                     |
| ST BARTHOLOMEWS HOSPITAL                     | DR DAVID PROPPER                                            | 74                     |
| QUEEN ALEXANDRA HOSPITAL                     | DR ANN O'CALLAGHAN                                          | 73                     |
| SJÆLLANDS UNIVERSITETS HOSPITAL, NÆSTVED     | DR NEILS HENRIK HOLLÄNDER                                   | 70                     |
| PRINCESS ALEXANDRA HOSPITAL                  | DR JOHN BRIDGEWATER                                         | 69                     |
| ROYAL MARSDEN HOSPITAL (SUTTON)              | PROFESSOR DAVID CUNNINGHAM                                  | 67                     |
| LEICESTER ROYAL INFIRMARY                    | PROFESSOR WILL STEWARD<br>PROFESSOR ANNE THOMAS             | 59                     |
| WORCESTER ROYAL HOSPITAL                     | DR DAVID FARRUGIA<br>DR MARK CHURN                          | 59                     |
| SINGLETON HOSPITAL                           | PROFESSOR JOHN WAGSTAFF                                     | 57                     |
| BIRMINGHAM HEARTLANDS HOSPITAL               | DR IAN GEH<br>DR SHOBHIT BAIJAL                             | 55                     |
| MAIDSTONE & TUNBRIDGE WELLS NHS TRUST        | DR MARK HILL                                                | 55                     |
| ROYAL SHREWSBURY HOSPITALS NHS TRUST         | DR SAIF AWWAD<br>DR ABEL ZACHARIAH                          | 54                     |
| NORTHAMPTON GENERAL HOSPITAL NHS TRUST       | DR KINNARI PATEL<br>DR CRAIG MACMILLAN<br>DR ROSHAN AGARWAL | 53                     |
| RUSSELLS HALL HOSPITAL                       | PROFESSOR DAVID FERRY<br>DR SIMON GRUMETT                   | 51                     |
| LINCOLN COUNTY HOSPITAL                      | DR TOM SHEEHAN<br>DR ZUZANA STOKES                          | 50                     |
| FIFE HEALTH BOARD                            | DR CATRIONA MCLEAN                                          | 48                     |
| KING EDWARD VII HOSPITAL                     | DR MARCIA HALL<br>DR MAHER HADAKI                           | 48                     |
| ROYAL HAMPSHIRE COUNTY HOSPITAL              | DR VIRGINIA HALL<br>DR SANJAY RAJ<br>DR DAVID NOLAN         | 48                     |
| SUNDERLAND ROYAL HOSPITAL                    | DR ASHRAF AZZABI                                            | 48                     |
| WEST SUFFOLK HOSPITAL                        | DR ANNE MARGARET MOODY                                      | 48                     |
| HAMMERSMITH HOSPITAL                         | DR CHARLES LOWDELL                                          | 47                     |
| CHURCHILL HOSPITAL                           | DR ANDREW WEAVER                                            | 46                     |

| SCOT SITE PRINCIPAL INVESTIGATOR RECRUITMENT |                                                                                |                        |
|----------------------------------------------|--------------------------------------------------------------------------------|------------------------|
| SITE NAME                                    | PRINCIPAL INVESTIGATOR(S)                                                      | TOTAL RE-<br>CRUITMENT |
| AARHUS UNIVERSITY HOSPITAL                   | DR RENÉ KRØJGAARD OLESEN                                                       | 45                     |
| YEOVIL DISTRICT HOSPITAL                     | DR STEPHEN FALK<br>DR JULIE WALTHER<br>DR ERICA BEAUMONT<br>DR MATTHEW SEPHTON | 43                     |
| KETTERING GENERAL HOSPITAL                   | DR CRAIG MACMILLAN<br>DR GUY FAUST<br>DR ROSHAN AGARWAL                        | 42                     |
| CROSSHOUSE HOSPITAL                          | DR JEFFERY WHITE                                                               | 41                     |
| MUSGROVE PARK HOSPITAL                       | DR JULIE WALTHER<br>DR CLARE BARLOW                                            | 41                     |
| WORTHING HOSPITAL                            | DR ANDREW WEBB                                                                 | 41                     |
| HINCHINGBROOKE HOSPITAL                      | DR CHERYL PALMER                                                               | 40                     |
| GREAT WESTERN HOSPITAL                       | DR CLAIRE HOBBS<br>DR SARAH LOWNDES                                            | 39                     |
| HOSPITAL UNIVERSITARI VALL D HEBRON          | DR ELENA ELEZ MEELEZ                                                           | 39                     |
| MONKLANDS DISTRICT GENERAL HOSPITAL          | DR ASHITA WATERSTON<br>DR CLINTON ALI<br>DR ANNE MCKILLOP                      | 39                     |
| WYCOMBE HOSPITAL                             | DR ANDREW WEAVER                                                               | 39                     |
| AALBORG HOSPITAL                             | DR JORGEN HANSEN<br>DR METTE YILMAZ                                            | 38                     |
| IPSWICH HOSPITAL                             | DR RUBIN SOOMAL<br>DR LIZ SHERWIN                                              | 38                     |
| PILGRIM HOSPITAL                             | DR TOM SHEEHAN<br>DR ZUZANA STOKES                                             | 38                     |
| RAIGMORE HOSPITAL                            | DR DAVID WHILLIS<br>DR NEIL MCPHAIL                                            | 38                     |
| ST JAMES'S UNIVERSITY HOSPITAL               | DR DANIEL SWINSON                                                              | 38                     |
| STEPPING HILL HOSPITAL                       | DR JURJEES HASAN                                                               | 38                     |
| WESTON PARK HOSPITAL NHS TRUST               | DR SIMON PLEDGE                                                                | 38                     |
| WITHYBUSH GENERAL HOSPITAL                   | DR VALLIPURAM VIGNESWARAN                                                      | 38                     |
| BELFAST CITY HOSPITAL                        | DR RICHARD WILSON                                                              | 37                     |
| GLAN CLWYD HOSPITAL                          | DR SIMON GOLLINS                                                               | 37                     |
| GUY'S AND ST THOMAS' NHS TRUST               | DR NICHOLAS MAISEY                                                             | 37                     |
| POOLE HOSPITAL NHS TRUST                     | DR TAMAS HICKISH<br>DR AMELIE HARLE                                            | 37                     |
| ROYAL BOURNEMOUTH HOSPITAL                   | DR TAMAS HICKISH                                                               | 37                     |
| WREXHAM MAELOR HOSPITAL                      | DR SIMON GOLLINS                                                               | 37                     |
| HILLERØD HOSPITAL                            | DR SVEND ERIK NIELSEN                                                          | 36                     |
| QUEEN ELIZABETH HOSPITAL - KING'S LYNN       | DR ATHAR AHMAD<br>DR GAIL HORAN                                                | 36                     |
| ST GEORGE'S HOSPITAL                         | DR FIONA LOFTS                                                                 | 36                     |
| UNIVERSITY COLLEGE LONDON HOSPITAL           | DR JOHN BRIDGEWATER                                                            | 36                     |
| YORK HOSPITAL                                | DR KIM LAST                                                                    | 36                     |
| NOTTINGHAM UNIVERSITY HOSPITAL NHS TRUST     | DR ERIC BESSELL<br>DR VANESSA POTTER<br>DR GEORGINA WALKER                     | 35                     |
| ROYAL BERKSHIRE HOSPITAL                     | DR JAMES GILDERSLEVE                                                           | 35                     |
| WEXHAM PARK HOSPITAL                         | DR MARCIA HALL<br>DR MAHER HADAKI                                              | 35                     |

| SCOT SITE PRINCIPAL INVESTIGATOR RECRUITMENT |                                                                  |                        |
|----------------------------------------------|------------------------------------------------------------------|------------------------|
| SITE NAME                                    | PRINCIPAL INVESTIGATOR(S)                                        | TOTAL RE-<br>CRUITMENT |
| SOUTH TYNESIDE DISTRICT HOSPITAL             | DR SHRAF AZZABI                                                  | 34                     |
| BROOMFIELD HOSPITAL                          | PROFESSOR SAAD TAHIR<br>DR GOPALAKRISHNAN SRINIVASAN             | 33                     |
| EASTBOURNE DISTRICT GENERAL                  | DR FIONA MCKINNA                                                 | 33                     |
| ICO L'HOSPITALET                             | DR RAMON SALAZAR<br>DR GEMMA SOLER                               | 33                     |
| TORBAY HOSPITAL                              | DR NANGI LO                                                      | 33                     |
| CONQUEST HOSPITAL                            | DR TIMOTHY SEVITT                                                | 32                     |
| LUTON AND DUNSTABLE HOSPITAL                 | DR SUZANNAH MAWDSLEY<br>DR FAYE LIM<br>PROFESSOR PETER HOSKIN    | 32                     |
| ABERDEEN ROYAL INFIRMARY                     | DR LESLIE SAMUEL                                                 | 31                     |
| BASINGSTOKE + NORTH HAMPSHIRE HOSPITAL       | DR CHARLOTTE REES                                                | 31                     |
| NORTH MIDDLESEX UNIVERSITY HOSPITAL          | DR JOHN BRIDGEWATER                                              | 31                     |
| QUEEN'S HOSPITAL BURTON                      | DR PRABIR CHAKRABORTI<br>DR PUGAZHENTHI PATTU<br>DR MAJUSHA KENI | 31                     |
| BLACKPOOL VICTORIA HOSPITAL                  | DR SHABBIR SUSNERWALA<br>DR SIN CHONG LAU                        | 30                     |
| CHELTENHAM GENERAL HOSPITAL                  | DR DAVID FARRUGIA                                                | 30                     |
| REGIONS HOSPITALET HERNING                   | DR NINA KELDSEN                                                  | 30                     |
| DIANA PRINCESS OF WALES HOSPITAL             | DR RAJARSHI ROY                                                  | 29                     |
| DORSET COUNTY HOSPITAL                       | DR RICHARD OSBORNE<br>DR MAXINE FLUBACHER                        | 29                     |
| CUMBERLAND INFIRMARY                         | DR JONATHAN J NICOLL                                             | 28                     |
| GLOUCESTERSHIRE ROYAL HOSPITAL               | DR DAVID FARRUGIA                                                | 28                     |
| HEREFORD COUNTY HOSPITAL                     | DR NICK REED                                                     | 28                     |
| RIGSHOSPITALET (RH)                          | DR LONE NØRGAARD                                                 | 28                     |
| WANSBECK HOSPITAL                            | DR WERNER DOBROWSKY<br>DR SANDEEP SINGHAL                        | 28                     |
| CHARING CROSS HOSPITAL                       | DR CHARLES LOWDELL<br>DR SUSAN CLEATOR                           | 27                     |
| PETERBOROUGH HOSPITAL                        | DR KAREN MCADAM<br>DR ABIGAIL HOLLINGDALE                        | 27                     |
| QUEEN ELIZABETH HOSPITAL - GATESHEAD         | DR WERNER DOBROWSKY<br>DR FIONA MCDONALD<br>DR MARK KATORY       | 27                     |
| QUEEN ELIZABETH HOSPITAL - BIRMINGHAM        | DR NEIL STEVEN                                                   | 27                     |
| SCARBOROUGH HOSPITAL                         | DR MOHAN HINGORANI<br>DR PUGAZHENTHI PATTU                       | 27                     |
| SOUTHEND HOSPITAL                            | DR DAVID TSANG                                                   | 27                     |
| JAMES COOK UNIVERSITY HOSPITAL               | DR NICHOLAS WADD                                                 | 27                     |
| ALTNAGELVIN HOSPITAL                         | DR RUSSELL HOUSTON<br>DR CLAIRE HARRISON<br>DR SONALI DASGUPTA   | 26                     |
| SCUNTHORPE GENERAL HOSPITAL                  | DR ABDEL HAMID<br>DR LORCAN O'TOOLE                              | 26                     |
| GOOD HOPE HOSPITAL                           | DR JOHN GLAHOLM<br>DR SHOBHIT BAIJAL                             | 25                     |
| ROYAL SUSSEX COUNTY HOSPITAL                 | DR ANDREW WEBB                                                   | 25                     |
| HOSPITAL DONOSTIA                            | DR ADELAIDA-LACASTA MUNOA                                        | 24                     |

| SCOT SITE PRINCIPAL INVESTIGATOR RECRUITMENT |                                                                                                                       |                        |
|----------------------------------------------|-----------------------------------------------------------------------------------------------------------------------|------------------------|
| SITE NAME                                    | PRINCIPAL INVESTIGATOR(S)                                                                                             | TOTAL RE-<br>CRUITMENT |
| NEW CROSS HOSPITAL                           | DR MARK CHURN<br>DR SIMON GRUMMET                                                                                     | 24                     |
| UNIVERSITY HOSPITAL OF NORTH STAFFORDSHIRE   | DR FAWZI ADAB                                                                                                         | 24                     |
| COUNTRESS OF CHESTER HOSPITAL                | DR ADRIAN MOSS<br>DR SHAKER ABDALLAH<br>DR DALE VIMALACHANDRAN                                                        | 23                     |
| UNIVERSITY HOSPITAL OF LEWISHAM              | PROFESSOR GEORGE MIKHAEL<br>DR JESSICA BRADY                                                                          | 23                     |
| ROYAL DERBY HOSPITAL                         | DR RAJENDRA KULKARNI                                                                                                  | 23                     |
| MEDWAY MARITIME HOSPITAL                     | DR JEFF SUMMERS<br>DR CHRISTOS MIKROPOULOS                                                                            | 22                     |
| ROYAL PRESTON HOSPITAL                       | DR SHABBIR SUSNERWALA<br>DR DEBORAH WILLIAMSON                                                                        | 22                     |
| UNIVERSITY HOSPITAL OF NORTH DURHAM          | DR FAREEDA COXON                                                                                                      | 22                     |
| COMPLEJO HOSPIT. UNIVERSITARIO DE SANTIAGO   | DR RAFAEL LOPEZ                                                                                                       | 21                     |
| FORTH VALLEY ROYAL HOSPITAL                  | DR GHAZIA SHAIKH<br>DR SARANYA KAKUMANU<br>DR STEPHEN HARROW<br>DR ADNAN SHAUKAT<br>DR AISHA TUFAIL<br>DR DAWN STOREY | 21                     |
| KENT AND CANTERBURY HOSPITAL                 | PROFESSOR ROGER JAMES<br>DR JULIA HALL<br>DR RAKESH RAMAN                                                             | 21                     |
| BASILDON HOSPITAL                            | DR DAVID TSANG                                                                                                        | 20                     |
| CLATTERBRIDGE CENTRE FOR ONCOLOGY            | DR DAVID SMITH<br>DR JULIE O'HAGAN                                                                                    | 20                     |
| FREEMAN HOSPITAL                             | DR FAREEDA COXON                                                                                                      | 20                     |
| STOKE MANDEVILLE HOSPITAL                    | DR ANDREW WEAVER                                                                                                      | 20                     |
| DARLINGTON MEMORIAL HOSPITAL                 | DR FAREEDA COXON                                                                                                      | 19                     |
| HARROGATE DISTRICT HOSPITAL                  | DR KIM LAST                                                                                                           | 19                     |
| HOSPITAL DEL MAR                             | DR JOAQUIM BELLMUNT                                                                                                   | 19                     |
| QUEEN ELIZABETH HOSPITAL - LONDON            | DR NICHOLAS MAISEY<br>DR ASAD QURESHI                                                                                 | 19                     |
| ROYAL MARSDEN HOSPITAL (FULHAM ROAD LONDON)  | PROFESSOR DAVID CUNNINGHAM                                                                                            | 19                     |
| SJÆLLANDS UNIVERSITETS HOSPITAL, ROSKILDE    | DR JIM STENFATT LARSEN                                                                                                | 19                     |
| ST HELENS AND KNOWSLEY NHS TRUST             | DR ERNEST MARSHALL                                                                                                    | 19                     |
| KAROLINSKA UNIVERSITY HOSPITAL               | DR GISELA NAUCLER<br>DR JAN-ERIK FRÖDIN                                                                               | 18                     |
| LISTER HOSPITAL                              | DR ROB HUGHES                                                                                                         | 18                     |
| ST MARY'S HOSPITAL (IOW)                     | DR CHRISTOPHER BAUGHAN<br>DR HARISH REDDY                                                                             | 18                     |
| GLANGWILI GENERAL HOSPITAL                   | DR MARGARET WILKINS<br>DR THI MAU-DON PHAN                                                                            | 18                     |
| WILLIAM HARVEY HOSPITAL                      | PROFESSOR ROGER JAMES<br>DR JULIA HALL                                                                                | 18                     |
| BRONGLAIS GENERAL HOSPITAL                   | DR ALAN AXFORD<br>DR SAJID DURRANI<br>DR ELIN JONES                                                                   | 17                     |

| SCOT SITE PRINCIPAL INVESTIGATOR RECRUITMENT |                                                                                    |                        |
|----------------------------------------------|------------------------------------------------------------------------------------|------------------------|
| SITE NAME                                    | PRINCIPAL INVESTIGATOR(S)                                                          | TOTAL RE-<br>CRUITMENT |
| DARENT VALLEY HOSPITAL                       | DR ANDREW GAYA<br>DR HAZIF AL GURAFI<br>DR RIYAZ NAZEERUL HAQ SHAH                 | 17                     |
| HAIRMYRES HOSPITAL                           | DR GRAINNE DUNN                                                                    | 17                     |
| KIDDERMINSTER HOSPITAL                       | DR MARK CHURN                                                                      | 17                     |
| THE ROYAL OLDHAM HOSPITAL                    | DR SAIFEE MULLAMITHA                                                               | 17                     |
| AYR HOSPITAL                                 | DR JEFFERY WHITE                                                                   | 16                     |
| CRAIGAVON AREA HOSPITAL                      | DR RICHARD PARK                                                                    | 16                     |
| ESBJERG HOSPITAL                             | DR BRITA BJERREGAARD                                                               | 16                     |
| KING'S MILL HOSPITAL                         | DR IVO HENNIG<br>DR ELEANOR JAMES<br>DR ELIOT CHADWICK<br>DR CHRISTINA LOPEZESCOLA | 16                     |
| WARRINGTON AND HALTON HOSPITALS NHS TRUST    | DR ADRIAN MOSS<br>DR AMY FORD                                                      | 16                     |
| HERLEV HOSPITAL                              | DR KIRSTEN VISTISEN                                                                | 15                     |
| HOSPITAL ARNAU DE VILLANOVA LLEIDA           | DR ANTONIA SALUD                                                                   | 15                     |
| MACCLESFIELD DISTRICT GENERAL HOSPITAL       | DR CATHERINE MCBAIN<br>DR GANESH RADHAKRISHNA                                      | 15                     |
| BRADFORD ROYAL INFIRMARY                     | DR CHRIS BRADLEY<br>DR ANDREW CONN                                                 | 14                     |
| NORTH WEST LONDON HOSPITALS NHS TRUST        | DR NICOLA ANYAMENE                                                                 | 14                     |
| ROYAL FREE HOSPITAL                          | DR ASTRID MAYER                                                                    | 14                     |
| SØNDERBORG HOSPITAL                          | DR JURIJ BOGOVIC                                                                   | 14                     |
| UNIVERSITY HOSPITAL OF NORTH TEES            | DR DAVID WILSON                                                                    | 14                     |
| BENDIGO HOSPITAL                             | DR ROBERT BLUM                                                                     | 13                     |
| BISHOP AUCKLAND GENERAL HOSPITAL             | DR NICK WADD<br>DR FAREEDA COXON                                                   | 13                     |
| CENTRAL HOSPITAL VASTERAS                    | DR HENRY LETOCHA<br>DR ANDRZEJ PIWOWAR                                             | 13                     |
| CITY HOSPITAL TRUST                          | DR DANIEL REA<br>DR PANKAJ PUNIA                                                   | 13                     |
| MANOR HOSPITAL                               | DR ANDREW HARTLEY<br>DR VICTORIA KUNENE                                            | 13                     |
| ROYAL HOBART HOSPITAL                        | DR RAY LOWENTHAL<br>DR DAVID BOADLE                                                | 13                     |
| ROYAL ALBERT EDWARD INFIRMARY                | DR GREGORY WILSON<br>DR ELENA TAKEUCHI<br>DR FRANCISCA ELENA MARTI                 | 13                     |
| WESTON GENERAL HOSPITAL                      | DR MARJORIE TOMLINSON<br>DR REUBEN WEST                                            | 13                     |
| AUSTIN HOSPITAL                              | DR NIAL TEBBUTT                                                                    | 12                     |
| BANKSTOWN - LIDCOMBE HOSPITAL                | DR RAY ASGHARI                                                                     | 12                     |
| NAMBOUR GENERAL HOSPITAL                     | DR MICHELLE CRONK                                                                  | 12                     |
| QUEEN ELIZABETH THE QUEEN MOTHER HOSPITAL    | PROFESSOR ROGER JAMES<br>DR JULIA HALL                                             | 12                     |
| BEDFORD HOSPITAL NHS TRUST                   | PROFESSOR ROBERT THOMAS                                                            | 11                     |
| HOSPITAL UNIVERSITARIO DE CANARIAS           | DR MARTA LLANOS                                                                    | 11                     |
| HOSPITAL CLINICO UNIVERSITARIO DE VALENCIA   | DR ANDRES CERVANTES                                                                | 11                     |
| ROYAL MARSDEN HOSPITAL (KINGSTON)            | DR DAVID CUNNINGHAM                                                                | 11                     |
| UPPSALA UNIVERSITY HOSPITAL                  | DR BENGT GLIMELIUS                                                                 | 11                     |



| SCOT SITE PRINCIPAL INVESTIGATOR RECRUITMENT     |                                            |                        |
|--------------------------------------------------|--------------------------------------------|------------------------|
| SITE NAME                                        | PRINCIPAL INVESTIGATOR(S)                  | TOTAL RE-<br>CRUITMENT |
| WEST CUMBERLAND HOSPITAL                         | DR JONATHAN J NICOLL                       | 11                     |
| WEST MIDDLESEX UNIVERSITY HOSPITALS              | DR PIPPA RIDDLE                            | 11                     |
| HOSPITAL CLINIC I PROVINCIAL DE BARCELONA        | DR CRISTINA NADAL<br>DR ESTELA PINEDA      | 10                     |
| NORTH DEVON DISTRICT HOSPITAL                    | DR MARK NAPIER                             | 10                     |
| SANDWELL GENERAL HOSPITAL                        | DR DANIEL REA<br>DR PANKAJ PUNIA           | 10                     |
| SOUTHPORT AND FORMBY DISTRICT GENERAL HOSPITAL   | DR ARTHUR SUN MYINT<br>DR NASIM ALI        | 10                     |
| ST MARY'S HOSPITAL LONDON                        | DR SUSAN CLEATOR                           | 10                     |
| THE TWEED HOSPITAL                               | PROFESSOR EHTESHAM ABDI                    | 10                     |
| YSBYTY GWYNEDD HOSPITAL                          | DR NICK STUART<br>DR CATHERINE BALE        | 10                     |
| BALLARAT HOSPITAL                                | DR GEOFF CHONG                             | 9                      |
| CANBERRA HOSPITAL                                | PROFESSOR DESMOND YIP                      | 9                      |
| CENTRALLASARETTET VAXJO                          | DR EVA FERNEBRO<br>DR ULRIKA PALENIUS      | 9                      |
| COMPLEJO HOSPITALARIO UNIVERSITARIO DE ALBACETE  | DR CARMEN ALONSO LOPEZ                     | 9                      |
| HOSPITAL UNIVERSITARIO MARQUES DE VALDECILLA     | DR FERNANDO RIVERA-HERRERO                 | 9                      |
| ST JOHN OF GOD HOSPITAL BUNBURY                  | DR MARTIN BUCK                             | 9                      |
| AIREDALE GENERAL HOSPITAL                        | DR ANDREW CONN                             | 8                      |
| AINTREE UNIVERSITY HOSPITALS                     | DR DAVID SMITH<br>DR JULIE HAGAN           | 8                      |
| ALFRED HOSPITAL                                  | DR ANDREW HAYDON                           | 8                      |
| AUCKLAND HOSPITAL                                | DR GEORGE LAKING                           | 8                      |
| CONCORD REPATRIATION GENERAL HOSPITAL            | PROFESSOR PHILIP BEALE                     | 8                      |
| FLINDERS MEDICAL CENTRE                          | DR CHRIS KARAPETIS                         | 8                      |
| HOSPITAL UNIVERSITARIO MADRID NORTE SANCHINARRO  | DR ANTONIO CUBILLO                         | 8                      |
| NORTH TYNESIDE GENERAL HOSPITAL                  | DR PHILIP ATHERTON                         | 8                      |
| ROYAL DEVON AND EXETER HOSPITAL                  | DR MELANIE OSBORNE<br>DR MARK NAPIER       | 8                      |
| COUNTY HOSPITAL RYHOV                            | DR HELGA HAGMAN                            | 7                      |
| HOSPITAL LA FE                                   | DR JORGE APARICIO                          | 7                      |
| HOSPITAL VIRGEN DE LA ARRIXACA                   | DR MIGUEL MARIN VERA                       | 7                      |
| INVERCLYDE ROYAL HOSPITAL                        | DR STEPHEN HARROW<br>DR DAWN STOREY        | 7                      |
| ROYAL LANCASTER INFIRMARY                        | DR DAVID FYFE<br>DR DAVID EATON            | 7                      |
| ROYAL BRISBANE AND WOMEN'S HOSPITAL              | DR MATTHEW BURGE                           | 7                      |
| WHITTINGTON HOSPITAL                             | DR DANIEL HOCHHAUSER<br>DR PAULINE LEONARD | 7                      |
| UNIVERSITY HOSPITAL OF HARTLEPOOL                | DR DAVID WILSON                            | 7                      |
| UNIVERSITY HOSPITAL LINKÖPING                    | DR MARIA ALBERTSSON                        | 7                      |
| CABRINI HOSPITAL                                 | DR ANDREW HAYDON                           | 6                      |
| CALDERDALE AND HUDDERSFIELD NHS FOUNDATION TRUST | DR JO DENT                                 | 6                      |
| DUMFRIES AND GALLOWAY ROYAL INFIRMARY            | DR LESLEY DAWSON                           | 6                      |
| HOSPITAL MIGUEL SERVET                           | DR ANTONIO ANTON                           | 6                      |
| HOSPITAL DE TXAGORRITXU                          | DR SEVERINA DOMINGUEZ                      | 6                      |

| SCOT SITE PRINCIPAL INVESTIGATOR RECRUITMENT       |                                                              |                        |
|----------------------------------------------------|--------------------------------------------------------------|------------------------|
| SITE NAME                                          | PRINCIPAL INVESTIGATOR(S)                                    | TOTAL RE-<br>CRUITMENT |
| LEIGHTON HOSPITAL                                  | DR CHAN TON<br>DR MICHAEL BRAUN                              | 6                      |
| MILTON KEYNES GENERAL HOSPITAL                     | Dr JILL STEWART<br>DR GERARD ANDRADE<br>DR SOMNATH MUKHERJEE | 6                      |
| PRINCE OF WALES HOSPITAL                           | PROFESSOR DAVID GOLDSTEIN                                    | 6                      |
| QUEEN ELIZABETH HOSPITAL (AUSTRALIA)               | PROFESSOR TIM PRICE                                          | 6                      |
| ROYAL NORTH SHORE HOSPITAL                         | DR ALEX GUMINSKI<br>ASSOCIATE PROFESSOR NICK PAVLA-<br>KIS   | 6                      |
| ST VINCENT'S HOSPITAL                              | DR EVA SEGELOV                                               | 6                      |
| ESSEX COUNTY HOSPITAL                              | DR BRUCE SIZER                                               | 5                      |
| FALU HOSPITAL                                      | DR AKE BERGLUND                                              | 5                      |
| PINDERFIELDS GENERAL HOSPITAL                      | DR GIREESH KUMARAN<br>DR KONSTANTINOS KAMPOSIORAS            | 5                      |
| CAMPBELLTOWN HOSPITAL                              | DR LORRAINE CHANTRILL                                        | 4                      |
| CHRISTCHURCH HOSPITAL                              | DR MARK JEFFERY                                              | 4                      |
| FURNESS GENERAL HOSPITAL                           | DR ALISON BIRTLE<br>DR DAVID EATON                           | 4                      |
| ILLAWARRA CANCER CENTRE (WOLLONGONG HOS-<br>PITAL) | DR MORTEZA AGHMESHEH                                         | 4                      |
| KALMAR COUNTY HOSPITAL                             | DR CHARLOTTE BRATTHALL                                       | 4                      |
| NEVIL HALL HOSPITAL                                | DR NAYYER IQBAL<br>DR MOHAMMED HARB<br>DR KEITH YINN         | 4                      |
| NEPEAN CANCER CARE CENTRE                          | DR JENNY SHANNON                                             | 4                      |
| NORRLANDS UNIVERSITY HOSPITAL                      | DR BIRGITTA LINDH                                            | 4                      |
| PRINCESS ALEXANDRA HOSPITAL (AUSTRALIA)            | DR WARREN JOUBERT                                            | 4                      |
| ROYAL DARWIN HOSPITAL                              | DR NARAYAN KARANTH                                           | 4                      |
| ST JOHN OF GOD HOSPITAL SUBIACO                    | DR SIOBHAN NG<br>DR TOM VAN HAGEN                            | 4                      |
| TAMWORTH BASE HOSPITAL                             | DR MATHEW GEORGE                                             | 4                      |
| ANTRIM AREA HOSPITAL                               | DR COLIN PURCELL                                             | 3                      |
| ST RICHARD'S HOSPITAL                              | DR SUHAIL BALUCH<br>DR ANN O'CALLAGHAN<br>DR YASSER HABA     | 3                      |
| WELLINGTON HOSPITAL                                | DR ANNE O'DONNELL                                            | 3                      |
| BALLARAT ONCOLOGY AND HAEMATOLOGY SER-<br>VICES    | DR GEORGE KANNOURAKIS                                        | 2                      |
| COFFS HARBOUR HEALTH CAMPUS                        | DR KAREN BRISCOE                                             | 2                      |
| GOSFORD HOSPITAL                                   | DR SUSAN TILEY                                               | 2                      |
| HALLANDS HOSPITAL                                  | DR LOTTA LUNDGREN                                            | 2                      |
| ROYAL PERTH HOSPITAL                               | DR DAVID RANSOM                                              | 2                      |
| UNIVERSITY HOSPITAL OF SKÅNE                       | DR MARGARETA HEBY                                            | 2                      |
| ARMIDALE HOSPITAL                                  | ASSOCIATE PROFESSOR NICK PAVLA-<br>KIS                       | 1                      |
| DUNEDIN HOSPITAL                                   | DR CHRIS JACKSON                                             | 1                      |
| HOSPITAL DE CRUCES                                 | DR GUILLERMO LOPEZ VIVANCO                                   | 1                      |
| ICO DEL HOSPITAL JOSEP TRUETA                      | DR BERNARDO QUERALT                                          | 1                      |
| ROYAL LIVERPOOL UNIVERSITY HOSPITAL                | DR DAVID SMITH                                               | 1                      |
| SUNDSVALL HÄRNÖSAND COUNTY HOSPITAL                | DR PETRA FLYGARE                                             | 1                      |
